1 Desalination and temperature increase will shift seasonal grazing patterns of  
2 invasive *Gammarus tigrinus* on charophytes

3 Authors: Berthold<sup>1, 2,\*</sup>, M.; Porsche<sup>3</sup>, C.; Hofmann<sup>3</sup>, A., Nowak<sup>3</sup>, P.

4 <sup>1</sup> – Applied Ecology and Phycology, University of Rostock, Rostock, Germany

5 <sup>2</sup> – Phytoplankton Ecophysiology, Mount Allison University, Sackville, Canada

6 <sup>3</sup> – Aquatic Ecology, University of Rostock, Rostock, Germany

7 \* – corresponding author: maximilian.berthold@uni-rostock.de

8 **Abstract**

9 Charophytes are a refuge for zooplankton and stabilize sediments, but they are also a food  
10 source for various animal species (water birds, fishes, invertebrates). Especially the  
11 introduction of new species, like *Gammarus tigrinus*, into the Baltic Sea led to yet not  
12 understood changes in the food web. Furthermore, future projections point to increased water  
13 temperatures at lowered salinity levels affecting species capacity to acclimatize to changing  
14 abiotic factors. In this study we investigated the influence of temperature and salinity on the  
15 grazing pressure of *Gammarus tigrinus* on two charophyte species: *Chara aspera* and *Chara*  
16 *tomentosa*. The grazing experiments were conducted in a full factorial design with the factors  
17 salinity (3 – 13 g kg<sup>-1</sup>), temperature (5 – 30 °C), and charophyte species. Grazing rates were  
18 determined as mass deviation within 48 hours considering biomass changes in the presence  
19 and absence of gammarids. Grazing rate were further used to calculate charophyte losses in  
20 two coastal lagoons with different salinity concentrations for recent and future time periods.  
21 The potential grazing peak of about 24 °C is not yet reached in these coastal waters but may  
22 be reached in the near future as shown by our future projection results. However, the  
23 temperature increase, and desalination will cause a shift in seasonal individual grazing

24 patterns from summer to spring and autumn. Desalination and temperature increase can lead  
25 to a shift in optimal habitats for *G. tigrinus* in the future.

26 **Keywords:** charophytes, grazing, *Gammarus tigrinus*, temperature, salinity, climate change

## 27 **Introduction**

28 Global climate change imposes several interacting effects on aquatic organisms. Besides the  
29 increase of water temperature, there may be regionally altered hydrological flow regimes that  
30 alter timing and amount of freshwater input into coastal waters. Native species get stressed by  
31 this development and ecosystems may be more susceptible to invasive species colonization.  
32 The Baltic Sea is such a system prone to eutrophication and global climate change, due to  
33 already increased sea surface temperatures, compared to other oceans worldwide (Reusch et  
34 al. 2018). The Baltic Sea is subject to large phytoplankton blooms since decades, with the  
35 riparian states working to reduce the impact of nutrient-run-off to the sea (Janssen et al. 2004,  
36 HELCOM 2018). Similar, the coastal water bodies of the Baltic Sea were impacted by  
37 eutrophication and shifts on primary producer dominance, i.e. from submerged macrophytes  
38 to phytoplankton (Schiewer 2007).

39 Charophytes are widely distributed in fresh and brackish water ecosystems (e.g. Schubert and  
40 Blindow 2003) and act as keystone organisms in shallow water ecosystems of the Baltic Sea  
41 because of their high biomasses (Lindner 1972). During the last decades, charophytes  
42 received attention as indicator species for oligotrophic water bodies, but also as pioneer  
43 species in post-eutrophied water bodies (e.g. Melzer 1999, Schubert and Blindow 2003).  
44 These traits make charophytes interesting foundation species as habitats are colonized  
45 regardless of trophic status (Schubert et al. 2018). Algae of the Characean family are  
46 currently listed as ‘endangered species’ in several European areas (Stewart and Church 1992,  
47 Blazencic et al. 2005, Gärdenfors 2010, Auderset Joye and Schwarzer 2012) and they are also

48 under pressure in the Baltic Sea. Comparisons of historical and recent distributions in the  
49 northern Baltic found that *C. aspera* and *C. tomentosa* were found 8 and 86% times less in the  
50 most recent transect, respectively (Pitkänen et al. 2013). Besides eutrophication related issues,  
51 salinity and/or temperature changes may influence successful recolonization in the future.  
52 Salinity changes in brackish water are such a factor, where increased salinity prevents the  
53 growth of macrophyte species (Lindner 1972). It was assumed that charophytes have several  
54 turbidity-reducing traits, like through for example lowering of resuspension of particulate  
55 matter, and direct (dissolved nutrients) and indirect (refuge for zooplankton) competition with  
56 phytoplankton (Kufel and Kufel 2002). Therefore, recolonization with those species could  
57 create feedback mechanism, favoring a macrophyte-dominated stable state.

58 However, restoration measures may be hampered by global climate change and the effects of  
59 desalination and increasing water temperature. Furthermore, there are hypotheses that not  
60 only abiotic parameters, but also top-down control (i.e. grazing) may affect the restoration of  
61 the pristine trophic state and macrophyte recolonization (Körner and Dugdale 2003, Östman  
62 et al. 2016). Besides grazing from native species (Körner and Dugdale 2003), there is also an  
63 increasing grazing pressure of invasive species introduced through, e.g. ballast water of ships.  
64 One of these species is the gammarid *Gammarus tigrinus* (Sexton 1939), a successful new  
65 species introduced from North America to European waters (Berezina 2007). This gammarid  
66 was described to colonize shallow waters, especially within reed, and soft bottom systems of  
67 the Baltic Sea (Daunys and Zettler 2006, Kotta et al. 2011). Amid global climate change,  
68 invasive species can alter known food web interactions and may counteract recolonization of  
69 former native primary producers (Puntila 2016). However, even these species are subject to  
70 global climate change and changes in the abiotic environment may support these invasive  
71 species even further (Kelley 2014).

72 The question evolves, if recolonization of macrophytes is not only hampered by abiotic  
73 factors, like temperature and salinity, but additionally by grazing pressure of (newly  
74 introduced) grazers. This grazing pressure likely changes throughout the year and may result  
75 in high-stress situations, where pressures of salinity and temperature amplify with grazing.  
76 *Gammarus tigrinus* and charophytes occur within the same depth distribution, and grazing  
77 can potentially happen. It was hypothesized that there is either a combination of factors  
78 (abiotic and biotic) that amplify mass loss on charophytes, or that some abiotic factors quench  
79 each other, e.g. lower salinity amplifies/buffers effects of higher temperatures. We tested the  
80 impact of salinity and temperature as well as their interactions on biomass change of  
81 charophytes in the presence and absence of grazers. These results also allow to discuss future  
82 developments within coastal water bodies at e.g. rising water temperatures, or desalination.  
83 Shallow coastal water bodies are likely to be more affected by such events due to their  
84 relatively shallow water column and close coupling with the adjacent land.  
85 We chose the Darss-Zingst lagoon system (DZLS) as model ecosystem for the southern Baltic  
86 Sea, due to its salinity and trophic gradient and decade-long monitoring record (see Schiewer  
87 2007). Even though nutrient concentrations were reduced to a comparable level between  
88 today and the 1930ies, no dense macrophyte cover was able to form in DZLS (Gessner 1957,  
89 Berthold et al. 2018a, Paar et al. 2021). Indeed, the maximum depth distribution of  
90 charophytes has not increased significantly in the DZLS during the last years, and  
91 charophytes are found only in very shallow waters, where light is not limiting (Piepho 2017).  
92 To account for this development, we combined the laboratory determined grazing potentials  
93 with field-based growth patterns of submerged macrophytes of the DZLS, and projected them  
94 with future salinity and temperature developments in these waters.

## 95 **Material and Methods**

### 96 Experimental design

97 We chose a full factorial design with three factors (Figure S1), for which one factor relates to  
98 species and includes two levels (*Chara aspera* and *C. tomentosa*), and the other two factors  
99 each with four levels are water temperature (9, 15, 24, and 30 °C), and salinity (3, 5, 7, 13 g  
100 kg<sup>-1</sup>). These salinity levels represent the salinity gradient from the Western belt Sea to the  
101 Gulf of Finland, covering most of the Baltic Sea area (HELCOM 2010). The water  
102 temperature levels represent the blooming period of shallow coastal waters (+1 °C in winter to  
103 +22 °C in summer, Schiewer 2007), with 30 °C as prospective endpoint of possible  
104 charophyte growth.

105 The DZLS is formed by four consecutive shallow lagoons, and shows a salinity and trophic  
106 gradient from the main river inflows Recknitz and Barthe (inner and middle part, salinity of 1  
107 – 6 g kg<sup>-1</sup>, eutrophic) to the open Baltic Sea (salinity of 10 – 12 g kg<sup>-1</sup>, mesotrophic,  
108 Schumann et al. 2006). Salinity varies from 4 – 6 g kg<sup>-1</sup> at the respective sampling locations  
109 in the Bodstedter Bodden (54°22'30,5" N, 12°34'14,9" E) and around 6 – 8 g kg<sup>-1</sup> in the  
110 Grabow (54°22'2,3" N, 12°48'27" E) (Schumann et al. 2006). During the experiment, two  
111 charophyte species were used, *Chara aspera* and *Chara tomentosa*. Both species are common  
112 in the Baltic Sea, with *C. aspera* covering the widest salinity range among charophytes  
113 (Blindow 2000). Along the west coast of Sweden, *C. aspera* is regularly found at sites with  
114 salinities up to 15 g kg<sup>-1</sup> (temporarily up to 20 g kg<sup>-1</sup>), but it is also common in freshwater  
115 (Hasslow 1931, Blindow 2000). *C. tomentosa* is among the largest charophyte species and can  
116 be found in freshwaters all over the world. Only in the Baltic Sea, *C. tomentosa* also occurs in  
117 brackish water, with a salinity range between 0 – 7.5 g kg<sup>-1</sup> (Björkman 1947, Torn et al.  
118 2003). Gammarids were derived from the Aquaculture section in Born of the State Research  
119 Centre for Agriculture and Fishery Mecklenburg-Vorpommern. This research facility is  
120 located at the DZLS and uses brackish water from the lagoon with a salinity of 4 – 6 g kg<sup>-1</sup>.  
121 Gammarids were identified by morphology and genetic analyses (see supplement).

122 Charophytes were extracted as intact plants from the DZLS. Charophytes were then cultured  
123 in beakers (vol. 500 ml) following the culture design described by Wüstenberg et al. (2011).  
124 Each beaker contained sediment containers (vol. 64 ml) with acid-rinsed, phosphorus-  
125 enriched sediment (6 g P kg<sup>-1</sup> sediment). Mineral growth media was prepared to culture  
126 charophytes (Pohl et al. 1987, Wüstenberg et al. 2011), but was adjusted to the respective  
127 salinities by adding marine salt (Instant Ocean, Aquarium Systems, Sarrebourg). Salinity was  
128 checked with a salinometer (Multiline P4, WTW). Each of the 16 combinations were  
129 replicated eight times with gammarids (= grazing treatment) and in absence of gammarids (=  
130 control) (Fig. S1). Gammarids were pre-acclimatized to experimental conditions by culturing  
131 them at the respective temperature and salinity combinations. Ten to 20 individuals were  
132 simultaneously cultured per temperature-salinity combination, aerating all cultures.  
133 Charophytes were added as food supplement, as well as resting surface for the gammarids.  
134 Charophytes were wet weighed and set into beakers filled with sediment and growth media of  
135 the respective salinity. Controls consisted of one charophyte, whereas grazing treatments  
136 consisted of one charophyte and five gammarids in one beaker. Control and grazing  
137 treatments were exposed to light intensities between 80 and 120  $\mu\text{mol photons m}^{-2} \text{s}^{-1}$  using  
138 fluorescent tubes (Phillips, TLD 36W/950). Each replicate run lasted for about 48 hours.  
139 Replicates were run in blocks over a period of four weeks per *Chara* species. Two out of the  
140 eight replicates per salinity-temperature combinations were conducted simultaneously to  
141 spread and randomize replicate runs over the four week period. According to previous studies  
142 on growth of charophyte (Nowak et al. 2017) we did not expect significant growth responses  
143 of *C. aspera* and *C. tomentosa* over the course of two days. However, it was expected to find  
144 significant mass deviations when gammarids were present.  
145 Charophytes were wet weighed after each replicate run to calculate mass differences. Dead  
146 gammarids were counted at the end of each replicate run and replaced for the next replicate

147 run. If possible, the same gammarids were used throughout all replicate runs. Equations 1 – 3  
148 were used to extract grazing rates of gammarids from growth rates of charophytes during the  
149 experiments. Grazing rates were treated with an error-propagation to account for experimental  
150 variability.

151 Equation 1 subtract the mean effect of biomass change of the control (C) from the treatment  
152 which also includes grazing (T):

$$G_i = T_i - \bar{C} \quad \{i = 1..n\}$$

153 Equation 2 standardizes the grazing effect from prior formula (z-score):

$$Gz_i = \frac{(G_i - \bar{G})}{\sigma_G} \quad \{i: 1..n\}$$

154 Equation 3 calculates the mean of pure grazing and include its error caused by the experiment:

$$Gf_i = \bar{G} + Gz_i \cdot \sqrt{|\sigma_T^2 - \sigma_C^2|} \quad \{i: 1..n\}$$

155 T = treatment, C = control, G= detrended grazing,  $G_z$  = standardized grazing,  $G_f$  = grazing  
156 with included experimental error, n = replicates

### 157 Field sampling and analyses

158 In addition, we used elemental and biomass composition of submerged macrophytes from the  
159 DZLS, to compare the experimental derived grazing rates to the actual ecosystem. Field  
160 sampling was conducted in the Bodstedter Bodden and the Grabow in 2014, as part of the  
161 BACOSA project. Interestingly, the Bodstedter Bodden has on average a lower salinity of 2 g  
162  $\text{kg}^{-1}$ , then the Grabow, coinciding with future desalination projections (Neumann and  
163 Friedland 2011). This difference may be used as model validation, if grazing rates of the  
164 present Bodstedter Bodden represent future grazing rates in the Grabow. Submerged  
165 macrophytes were sampled throughout the year, first in 54x54 cm plots, and in 25x25 cm

166 plots later during the year at nine different depths. Here, three sampling locations were pooled  
167 into three depth zones, according to water depth and proximity to the reed belt. Water depths  
168 for both stations varied with water levels in the respective lagoons and were shallow (30 – 60  
169 cm), intermediate (60 – 90 cm), and deep (90 – 120 cm). Sampled macrophytes were  
170 separated on the genus level. Whole plants, including roots, were wet-weighted and then dried  
171 at 60 °C for 24 h. Afterwards, dry mass (DM) was re-weighted again to calculate water  
172 content. Dried plant material was ground with a ball mill. The powder was treated with 1M  
173 HCl to remove inorganic carbon residues and then weighed in tin-container (1 × 0.5 cm).  
174 These samples were analyzed for their carbon and nitrogen content using an elemental  
175 analyzer (varioEL III). The analyzer was calibrated using acetanilide (~5 mg per sample).  
176 Aliquots of dried plant material were weighed in crucibles and combusted at 550 °C for 4 h.  
177 The ash was re-weighted to calculate ash-free dry mass. Ashes were used to determine total  
178 phosphorus content (mg P g<sup>-1</sup> dry mass), using an acid persulfate extraction (see Berthold et  
179 al. 2015).

#### 180 Data analyses

181 We further used the experimental grazing data to calculate grazing rates based on salinity and  
182 water temperature at two sites of the DZLS. The data set failed to show homogeneity of the  
183 residuals, and was therefore Box-Cox power transformed (*bcnPower* function, R package  
184 “*car*”, Fox and Weisberg 2019). Finally, general linear models (GLM, *glm* function, R  
185 package “*stats*”, R Core Team 2019) and generalized additive models (GAM, *gam* function, R  
186 package “*mgcv*”, Wood 2011), both with Gaussian distributional assumptions, were  
187 compared by the Akaike Information Criterion (AIC, R package “*stats*”, R Core Team 2019)  
188 and the Bayesian Information Criterion (BIC, R package “*stats*”, R Core Team 2019),  
189 choosing the model with low AIC and BIC values. We chose the GAM (with knots,  $k = 16$ ) as



190 the best model to reflect the experimental data (see Results). To our knowledge, recent studies  
191 on seasonal population dynamics of *G. tigrinus* are currently missing in our study system, as  
192 elsewhere in the Baltic Sea. However, recent field studies found 5 to 2200 Ind m<sup>-2</sup>  
193 (gammarids on genus level) in the DZLS and the adjacent Western Rügen lagoon system.  
194 Largest, but fewest animals were found early in the year (22 – 28 mg Ind<sup>-1</sup>), with decreasing  
195 mass, but increasing abundance in summer (3.5 mg Ind<sup>-1</sup>) (M. Paar, personal communication).  
196 These patterns point to the same seasonal development as described in Chambers (1977). If  
197 we assume that *G. tigrinus* constitutes 20% of the local gammarid population in the DZLS  
198 (Zettler 2001), we get a population size of up to 450 Ind m<sup>-2</sup>. These numbers are in agreement  
199 with first described abundances of *G. tigrinus* of 300 – 500 Ind m<sup>-2</sup> in the phytal and reed belt  
200 of the DZLS (Zettler 1995), or 30 – 110 Ind m<sup>-2</sup> in the Neva estuary (Baltic Sea, Berezina  
201 2007).

202 We used again a GAM model to calculate the seasonal population development of *Gammarus*  
203 *tigrinus*, normalized the predicted seasonal data to have a maximum of 1. Then, we used this  
204 normalized prediction to calculate population densities with a maximum of 400 Ind m<sup>-2</sup>  
205 (Zettler 1995, M. Paar personal communication, Fig. S6). These population numbers were  
206 combined with the individual grazing rates of the temperature-salinity model with field data  
207 from the two sites of the DZLS (Equation 4) to calculate seasonal grazing rates. We used a  
208 fixed grazing preference of 20% macrophyte share in gammarid diets, that means grazing  
209 rates were multiplied by a factor of 0.2 (Pellan et al. 2016). Furthermore, we used the GAM to  
210 predict the charophyte development as function of sampling date ( $k = 8$ ) at two sites of the  
211 DZLS. We calculated daily biomass increase and subsequently added gammarid grazing rates  
212 to determine the potential gross biomass production per site (see Results and Discussion  
213 below).

214 Equation 4 calculates the seasonal grazing rates per square meter and day for specific sites:

$$Graz_t = G_{GAM_t}\{T_t; S_t\} \cdot \delta_t \cdot 0.2 \quad \{t: 1..n\}$$

215  $t$  = day of the year,  $Graz_t$  = grazing at day  $t$  ( $\text{mg}\cdot\text{m}^{-2}\cdot\text{d}^{-1}$ ),  $G_{GAM_t}$  = modelled grazing rate of one  
216 individual at time  $t$  with given temperature ( $T$ ) and salinity ( $S$ ) from specific site at time  $t$ ,  $\delta_t$  =  
217 population density at time  $t$  ( $\text{individuals}\cdot\text{m}^{-2}$ ),  $0.2$  = reflects the 20 % fixed grazing preference,  
218  $n$  = length of the year in days

## 219 **Results**

### 220 Growth and survival rate

221 Starting biomasses of *C. aspera* in control and treatment beakers ranged from 50 to up to 300  
222 mg, with the most macrophytes being within the range of 100 – 175 mg (70 %). After two  
223 days, biomass distribution of *C. aspera* in control beakers stayed relatively the same, but  
224 smaller and larger biomass proportions increased. Biomass of *C. aspera* decreased with  
225 increasing temperature at all salinities, but strongest at salinities  $> 7 \text{ g kg}^{-1}$ . Contrary, biomass  
226 stayed almost constant at lower temperature, even at higher salinities (Supplement Table S2  
227 and Figure S4).

228 Starting biomass of *C. tomentosa* in control beakers ranged from 75 to up to 600 mg, and 40  
229 % of all macrophytes were within the range of 100 – 125 mg at the beginning. Contrary to *C.*  
230 *aspera*, biomass of *C. tomentosa* in treatment beakers was close to a normal distribution with  
231 50 % of all macrophytes being within the range 175 – 225 mg at the beginning. The biomass  
232 distribution of *C. tomentosa* in control beakers stayed almost the same, but with a trend to  
233 smaller biomasses, indicating minor biomass losses even without grazing. Biomass of *C.*  
234 *tomentosa* stayed very constant at almost every temperature-salinity combination. There was a  
235 possible growth at temperatures of 15 to 24 °C at salinities of  $7 \text{ g kg}^{-1}$  (Supplement Figure  
236 S4). If results of both charophyte control beakers were combined, the area with stable biomass  
237 over two days expands from 10 – 25 °C and salinities of  $7 - 13 \text{ g kg}^{-1}$ . In total, these results

238 indicate an overall stable experimental approach, as significant growth was not expected  
239 within two days.

240 Two thirds of the time (65 %) all gammarids survived at all temperature-salinity-macrophyte  
241 combinations in treatment beakers. Additionally, 30 % of the time, only one gammarid died  
242 during incubation. These results indicate overall stable culture conditions and the capability of  
243 these gammarids to survive a wide range of temperature-salinity gradients.

#### 244 Gammarid grazing on charophytes

245 Biomass in treatment beakers decreased in all combinations and beakers. Differences to  
246 control beakers were always significant, regardless of charophyte species, or treatment (see  
247 Supplement table S2). Grazing rates ranged between 1 to 10 mg FM Ind<sup>-1</sup> gammarid d<sup>-1</sup> on *C.*  
248 *aspera*, already accounting for biomass changes in control beakers. Grazing rates peaked at  
249 24 °C and tended to be higher with increasing salinities. Grazing ranged between 1 to 5 mg  
250 FM Ind<sup>-1</sup> gammarid d<sup>-1</sup> on *C. tomentosa*. Grazing rates peaked again at 24 °C for all salinity  
251 levels but with a tendency to slightly lower salinity compared to grazing rates on *C. aspera*.  
252 Interestingly, highest grazing rates per charophyte species fell into temperature ranges where  
253 charophytes already showed highest loss rates in control beakers. In general, grazing rates on  
254 *C. aspera* were up to two times higher compared to *C. tomentosa*. Pooled grazing rates of  
255 both charophyte species were on average up to 5.5 mg Ind<sup>-1</sup> d<sup>-1</sup>.

#### 256 Field data results and model

257 Seasonal daily grazing rates within the ecosystem would range from 0.1 up to 5 mg FM Ind<sup>-1</sup>  
258 d<sup>-1</sup>, when applying the grazing model on field observations of temperature and salinity of  
259 Grabow and Bodstedter Bodden (Figure 5). Grazing rates would peak during summer and be  
260 lowest at winter at the two sampling stations of the DZLS (see Figure 5). *Gammarus tigrinus*  
261 was originally collected in April/May, where grazing rates are not at its peak. Nonetheless,

262 gammarids grazed twice as much at 24 °C in our treatments, as would be expected from their  
263 initial collection time in April and May. These findings indicate acclimation processes.  
264 Interestingly, the modelled grazing rates differed significantly between both stations ( $p <$   
265  $0.001$ , paired Mann-Whitney U-Test), even though the difference in salinity are only  $2 \text{ g kg}^{-1}$ .  
266 Charophyte biomass was highest in the shallow areas, close to the reed belt at both sampling  
267 sites (Figure 6). Biomass in the shallow zone peaked in July in the less eutrophic Grabow, and  
268 in October in the highly eutrophic Bodstedter Bodden. Contrary, charophyte biomass was  
269 higher in the Bodstedter Bodden at intermediate distances/water depths compared to the  
270 Grabow. However, Grabow biomass peaked during summer, whereas biomass in the  
271 Bodstedter Bodden became depressed during that time. Charophytes were only found in very  
272 little biomasses in the deeper water areas at both sampling locations, indicating a possible  
273 light limitation from shallow to deep.  
274 Charophyte biomass would have been up to 15 – 50% higher at shallow and intermediate  
275 depths, if macrophyte growth is corrected for seasonal gammarid grazing. Additionally,  
276 gammarid grazing would follow charophyte biomass peaks at the respective stations. The  
277 yearly potential grazing rate for *G. tigrinus* on charophytes ranges from  $37.2$  to  $42.5 \text{ g FM m}^{-2}$ ,  
278 considering regional salinity and temperature patterns within the DZLS.

#### 279 Future projections on desalination and temperature increase in the period of 2050 – 2100

280 The projected grazing rates vary significantly from today's grazing rates ( $p < 0.001$ , paired  
281 Mann-Whitney U-Test), when considering future desalination and temperature increase in this  
282 region (van der Linden and Mitchell n.d., Neumann and Friedland 2011). Individual grazing  
283 rates would increase in spring and autumn at both stations, but grazing rates in the Grabow  
284 being at least twice as high as in the Bodstedter Bodden. Furthermore, individual grazing rates  
285 would probably drop during summer, as water temperatures will fall out of optimum ranges  
286 for *G. tigrinus*. These differences in future grazing rates are caused by earlier warmer

287 temperatures, and lower salinities, increasing future individual grazing pressure in the  
288 Grabow. However, this double peak is not apparent, when the seasonal population structure is  
289 included. Areal grazing rates would not be different during spring, and even lower during  
290 summer. However, grazing rates would strongly increase during autumn at both stations. This  
291 peak is caused by the late population peak of gammarids, and the increased temperature in  
292 future projections. This grazing pattern would likely affect charophytes in the turbid  
293 Bodstedter Bodden, as they showed highest biomass during autumn.

## 294 **Discussion**

295 Charophyte growth and gammarid grazing rates in our experiment and in the field depend on  
296 changes in the abiotic environment. However, grazing rates are simultaneously influenced by  
297 available food sources for gammarids, occurrence of competing species and predators, or  
298 ultimately habitat choice and niche occupation.

299 In this study, desalination and temperature increase experiments lasted only for two days.  
300 Charophytes of control beakers showed only little, if any biomass increase, and cannot be  
301 used for long-term growth projections. There are complex interactions between abiotic factors  
302 (e.g. salinity, temperature, light climate) that influence charophyte growth and these effects  
303 depend on species-specific characteristics, local environmental conditions, and probably  
304 locally adapted sub-populations (Blindow et al. 2009, Auderset Joye and Rey-Boissezon  
305 2015, Rojo et al. 2017). Distinct *C. aspera* populations can show different growth optima  
306 depending on the habitat (freshwater and brackish), which is translated by changing  
307 photophysiological characteristics at varying salinities (Blindow et al. 2003, Blindow and  
308 Schütte 2007). Likewise, water temperature shapes charophyte populations, which may result  
309 in local biomass decreases of *C. aspera*, *C. tomentosa* and *C. vulgaris* if temperature increases  
310 more than 2 °C (Auderset Joye and Rey-Boissezon 2015, Choudhury et al. 2019). Even our

311 short-term experiments may confirm these results, as both charophyte species lost most  
312 biomass at temperatures above average summer habitat temperatures ( $> 24\text{ }^{\circ}\text{C}$ ). However,  
313 interactions of abiotic factors do not necessarily induce synergistic effects in charophytes  
314 (Rojo et al. 2017, Puche et al. 2018). Our short-term growth controls showed synergistic  
315 effects on charophyte growth rates for different temperature and salinity conditions (Fig S4).  
316 Further studies are needed to clarify long term charophyte changes in the face of increasing  
317 water temperatures and decreasing salinities, especially among locally adapted sub-  
318 populations.

319 Several physiological reactions, like survivability or oxygen consumption of *G. tigrinus* on  
320 salinity and temperature changes have already been described in the literature (Dorgelo 1973,  
321 1974, Koop and Grieshaber 2000). *Gammarus tigrinus* survives within a broad salinity-  
322 temperature spectrum, where only full marine or freshwater conditions show highest  
323 mortalities. Furthermore, potential synergetic were observed with higher temperatures  
324 buffering higher salinities, with survival rates 10-times lower at  $5\text{ }^{\circ}\text{C}$ , compared to  $25\text{ }^{\circ}\text{C}$   
325 (Dorgelo 1974).

326 Grazing rates in our study suggest similar findings, as lowest temperatures strongly reduced  
327 grazing rates, regardless of salinity. There was also a tendency to higher grazing rates, at  
328 higher salinity/temperature combinations, compared to high salinity/low temperatures,  
329 indicating a grazing optima at higher temperatures. Ion regulation in *G. tigrinus* happens fast,  
330 and can regulate sudden high ionic stress to a variety of ions (Na, Cl, K) without  
331 compensation losses. However, hypoosmotic, that means low salinity conditions, cause  
332 increased  $\text{NO}_3$  inflow into *G. tigrinus* hemolymph, probably causing decreased survivability  
333 (Koop and Grieshaber 2000). The growth media for charophytes in our experiment has  
334 elevated  $\text{NO}_3$  concentrations (3 mM  $\text{KNO}_3$ , Pohl et al. 1987). This elevated  $\text{NO}_3$   
335 concentrations may have caused lower grazing rates at lower salinities in our study.

336 Besides abiotic factors, population structure influenced the grazing rates of gammarids.  
337 Populations of *G. tigrinus* were described to turn-over at least three times per year, with a  
338 peak of large animals (6 – 9 mm) in spring, and a concomitant shift to smaller animals in late  
339 summer (2 – 4 mm) (Chambers 1977). We used animals in the size range of 6 – 12 mm, i.e.  
340 large adults for all of our experiments. This size class is only dominant by up to 60% until  
341 May, and is almost completely replaced by smaller animals from June to September  
342 (Chambers 1977). This pre-selection had likely an effect on the described grazing rates, as  
343 metabolic rates of *G. tigrinus* increase with lower weight in form of a power function  
344 (Normant et al. 2007). Gammarids in our study weighed from 10 – 90 mg wet mass Ind<sup>-1</sup>  
345 (data not shown), whereas the gammarids of Normant et al. (2007) were caught in August,  
346 and weighed only 5 – 25 mg wet weight Ind<sup>-1</sup>. Animals of our study should therefore showed  
347 lower specific metabolic rates of 0.25 – 1.5 mW g<sup>-1</sup> wet mass, compared to 1 – 3.5 mW g<sup>-1</sup>  
348 wet mass in smaller gammarids (Normant et al. 2007). This reduced metabolic rate had likely  
349 an impact on the grazing rates we found in this study, as grazing for metabolic upkeep is  
350 lower in large adult animals.

351 The results of this study indicate that the individual grazing rates of *G. tigrinus* will change  
352 over the next 50 to 100 years. During that time, the optimal properties of temperature and  
353 salinity for *G. tigrinus* will increase in spring and autumn months and decrease during  
354 summer months.  
355 Springtime is a crucial period for charophyte sprouting, as the active growth of for example  
356 *C. tomentosa* takes place during a relatively short period at the beginning of summer (Torn et  
357 al. 2006). Furthermore, young sprouted charophytes show a higher elemental content per  
358 biomass, than for example tracheophytes (Volkman 2016, this study), making them a  
359 preferred grazing opportunity (Kraufvelin et al. 2006). *Gammarus locusta* follows a  
360 preference for high value plant material and selectively feeds on more nutrient-rich

361 macrophytes, especially periphyton, brown and green algae (Kraufvelin et al. 2006). If *G.*  
362 *tigrinus* shows similar grazing preferences, periphyton from tracheophytes would be the first  
363 choice followed by charophytes in the DZLS. Periphyton (Sanudo-Wilhelmy et al. 2004) and  
364 possibly charophytes (Kufel and Kufel 2002) can take up large amounts of dissolved nutrient  
365 that occur frequently through diffuse run-off (Berthold et al. 2018b). Tracheophytes in the  
366 DZLS and adjacent lagoons can show high colonization rates by epiphytes (Paar et al. 2021),  
367 offering an additional plant food source to gammarids. Nonetheless, charophytes in the DZSL  
368 showed higher C:N and N:P ratios, then tracheophytes, making them more likely to gammarid  
369 grazing as high-value food (see Fig S7). Furthermore, this pre-selection of high-value food  
370 may explain the differences in grazing rates on *C. tomentosa* vs. *C. aspera* found in this study.  
371 *C. tomentosa* can show higher C:N ratios (44:1) than *C. aspera* (27:1), making it maybe a less  
372 favorable food source. Furthermore, *C. aspera* showed in our study signs of early decay at  
373 higher temperatures, contrary to *C. tomentosa* (see trends in control beakers, Figure S4). Such  
374 beginning decay can weaken *C. aspera* and make it more susceptible to grazing (Buchsbaum  
375 et al. 1991), explaining the deviation of grazing rates between both charophytes along the  
376 temperature gradient found in this study.

377 The drop of grazing rates during future summer conditions is probably caused by below-  
378 optimum water temperatures in combination with lowered salinities. The impact on future  
379 summer impact grazing is more pronounced in Bodstedter Bodden, then in the Grabow. This  
380 difference is probably caused by even lower salinity concentrations in the Bodstedter Bodden,  
381 indicating that future desalination can lead to shifts of preferred habitats.

382 Food preferences can change throughout the year depending on gammarid life stage and  
383 temperature (Felten et al. 2008, Pellan et al. 2016). Plant biomass becomes increasingly  
384 important, when temperatures increase and can reach up to 20 – 30% of total food consumed  
385 (Pellan et al. 2016). Grazing on charophytes can happen earlier in the year, and lasts longer



386 during autumn. This effect does not come into effect in our future projection model, as the  
387 current modelled population densities of gammarids are lowest in spring. Nonetheless,  
388 prolonged grazing may hamper charophytes sprouting in spring (*C. aspera*) and lower  
389 biomass of overwintering species (*C. tomentosa*) (Torn et al. 2006, Blindow et al. 2016).

390 Functional feeding in gammarids relies furthermore on population composition and food  
391 availability (Kelly et al. 2002). Other food sources like detritus, plant litter, or animal matter,  
392 like chironomides, are usually important food sources during winter time (Felten et al. 2008,  
393 Pellan et al. 2016). Sediment organic content can be as high as 20% in sediments of the DZLS  
394 (Berthold et al. 2018c). Sediment detritus was not an alternative source in our experiments, as  
395 we used only inorganic sand. Plant litter occurs abundantly within the reed belt during winter  
396 time in the DZLS (Karstens et al. 2016). Our experimental results show therefore only a  
397 potential grazing rate, as we did not represent the variety and abundance of alternative food  
398 sources from within the ecosystem.

399 Furthermore, grazing rates depend on niche occupation and competition with native and other  
400 invasive species. *Gammarus tigrinus* can probably outcompete the native *G. salinus*, if both  
401 depend on *Pylaiella littoralis* in the northern Baltic Sea (Orav-Kotta et al. 2009). Both  
402 gammarids had the potential to exceed daily macrophyte production during summer (Orav-  
403 Kotta et al. 2009).

404 *G. tigrinus* may be more tolerant against heat waves and sub-oxic conditions, than native  
405 species (Lenz et al. 2011). These broader temperature acclimation abilities may help to  
406 permanently introduce *G. tigrinus* within the Baltic Sea, as sea surface temperature are  
407 already higher there, than in other ocean parts (Reusch et al. 2018). Furthermore, endurance  
408 of sub-oxic conditions is an advantage in eutrophic coastal waters of the Baltic, as redox  
409 conditions within the reed belt can change fast (Karstens et al. 2015), and an increase of  
410 nutrients is challenging submerged macrophytes in the coastal water bodies of the southern

411 Baltic Sea (Paar et al. 2021), stressing habitats of native gammarids. Contrary, an *in silico*  
412 study assumed that *G. tigrinus* has actually a narrower niche than native gammarids in the  
413 northern Baltic Sea (Herkül et al. 2016). These results are somewhat contradictory to other  
414 studies in this area (Korpinen and Westerborn 2009, Kotta et al. 2011, Lenz et al. 2011), and  
415 may have not considered the impact of haplotype-diversity (Baltazar-Soares et al. 2017), that  
416 means locally adapted populations of *G. tigrinus*. Different studies revealed high genetic  
417 variability of *G. tigrinus* in the Baltic Sea (Supplement Table 1, Figure S2, Kelly et al. 2006  
418 and Paiva et al. 2018) indicated that the invasive species may have different tolerance and  
419 different limits to salinities due spatially varying selection among populations.

420 The patchy macrophyte stands found in the DZLS, and in other eutrophic water bodies, may  
421 affect the occurrence of *G. tigrinus*, and therefore the grazing rates, especially in intermediate  
422 and deeper waters. Palaemonid prawns put a higher grazing pressure on *G. tigrinus* in  
423 unvegetated mesocosms, then in vegetated ones (Kuprijanov et al. 2015). It is likely that *G.*  
424 *tigrinus* stays close to the reed belt, as described for this lagoon and other coastal waters  
425 (Zettler 1995, 2001). This spatial distribution would further hamper charophyte  
426 recolonization, as the shallow areas in the DZLS are the only spots, where light availability is  
427 high enough to support charophyte biomass (see Figure S6, Piepho 2017).

## 428 **Acknowledgements**

429 The authors thank the State Agency for Environment, Nature Conservation and Geology  
430 Mecklenburg-Vorpommern for providing monitoring data and the Aquaculture section in  
431 Born of the State Research Centre for Agriculture and Fishery Mecklenburg-Vorpommern for  
432 providing gammarids. We also want to thank Dr. Ralf Bastrop for providing the respective  
433 primers, and Dr. Martin Paar for providing us with recent data on gammarid distribution in  
434 the southern Baltic Sea.

435 **References**

- 436 Auderset Joye, D., and A. Rey-Boissezon. 2015. Will charophyte species increase or decrease  
437 their distribution in a changing climate? *Aquatic Botany* 120:73–83.
- 438 Auderset Joye, D., and A. Schwarzer. 2012. Red List Characeae. Threatened Species in  
439 Switzerland. Status 2010.
- 440 Baltazar-Soares, M., F. Paiva, Y. Chen, A. Zhan, and E. Briski. 2017. Diversity and  
441 distribution of genetic variation in gammarids: Comparing patterns between invasive and  
442 non-invasive species. *Ecology and Evolution* 7:7687–7698.
- 443 Bandelt, H. J., P. Forster, and A. Rohl. 1999. Median-joining networks for inferring  
444 intraspecific phylogenies. *Molecular Biology and Evolution* 16:37–48.
- 445 Berezina, N. A. 2007. Expansion of the North American amphipod *Gammarus tigrinus*  
446 Sexton, 1939 to the Neva Estuary (easternmost Baltic Sea). *Oceanologia* 49:129–135.
- 447 Berthold, M., U. Karsten, M. von Weber, A. Bachor, and R. Schumann. 2018a. Phytoplankton  
448 can bypass nutrient reductions in eutrophic coastal water bodies. *Ambio* 47 (1):146–158.
- 449 Berthold, M., S. Karstens, U. Buczko, and R. Schumann. 2018b. Potential export of soluble  
450 reactive phosphorus from a coastal wetland in a cold-temperate lagoon system: Buffer  
451 capacities of macrophytes and impact on phytoplankton. *Science of the Total*  
452 *Environment* 616–617:46–54.
- 453 Berthold, M., D. Zimmer, V. Reiff, and R. Schumann. 2018c. Phosphorus Contents Re-visited  
454 After 40 Years in Muddy and Sandy Sediments of a Temperate Lagoon System.  
455 *Frontiers in Marine Science* 5:1–14.
- 456 Berthold, M., D. Zimmer, and R. Schumann. 2015. A simplified method for total phosphorus  
457 digestion with potassium persulphate at sub-boiling temperatures in different

- 458 environmental samples. *Rostocker Meeresbiologische Beiträge* 25:7–25.
- 459 Björkman, S. O. 1947. On the distribution of *Chara tomentosa* L. round the Baltic and some  
460 remarks on its specific epithet. *Botaniska Notiser* 1947:157–170.
- 461 Blazencic, J., B. Stevanovic, Z. Blazencic, and V. Stevanovic. 2005. Red Data List of  
462 Charophytes in the Balkans. *Biodiversity & Conservation* 15:3445–3457.
- 463 Blindow, I. 2000. Distribution of charophytes along the Swedish coast in relation to salinity  
464 and eutrophication. *International Review of Hydrobiology* 85:707–717.
- 465 Blindow, I., S. Dahlke, A. Dewart, S. Flüge, M. Hendreschke, A. Kerkow, and J. Meyer.  
466 2016. Long-term and interannual changes and viable diaspore reservoir of submerged  
467 macrophytes in a shallow brackish water bay of the southern Baltic Sea - influence of  
468 eutrophication and climate. *Hydrobiologia*:1–16.
- 469 Blindow, I., J. Dietrich, N. Möllmann, and H. Schubert. 2003. Growth, photosynthesis and  
470 fertility of *Chara aspera* under different light and salinity conditions. *Aquatic Botany*  
471 76:213–234.
- 472 Blindow, I., N. Möllmann, M. G. Boegle, and M. Schütte. 2009. Reproductive isolation in  
473 *Chara aspera* populations. *Aquatic Botany* 91:224–230.
- 474 Blindow, I., and M. Schütte. 2007. Elongation and mat formation of *Chara aspera* under  
475 different light and salinity conditions. *Hydrobiologia* 584:69–76.
- 476 Buchsbaum, R., I. Valiela, T. Swain, M. Dzierzeski, and S. Allen. 1991. Available and  
477 refractory nitrogen in detritus of coastal vascular plants and macroalgae. *Marine Ecology*  
478 *Progress Series* 72:131–143.
- 479 Chambers, M. R. 1977. The population ecology of *Gammarus tigrinus* (sexton) in the reed  
480 beds of the Tjeukemeer. *Hydrobiologia* 53:155–164.

- 481 Choudhury, M. I., P. Urrutia-Cordero, H. Zhang, M. K. Ekvall, L. R. Medeiros, and L.-A.  
482 Hansson. 2019. Charophytes collapse beyond a critical warming and brownification  
483 threshold in shallow lake systems. *Science of The Total Environment* 661:148–154.
- 484 Daunys, D., and M. L. Zettler. 2006. Invasion of the North American Amphipod (*Gammarus*  
485 *tigrinus* Sexton, 1939) into the Curonian Lagoon, South-Eastern Baltic Sea. *Acta*  
486 *Zoologica Lituanica* 16:20–26.
- 487 Dorgelo, J. 1973. Comparative ecophysiology of gammarids (crustacea: amphipoda) from  
488 marine, brackish and fresh-water habitats exposed to the influence of salinity-  
489 temperature combinations. III. Oxygen uptake. *Netherlands Journal of Sea Research*  
490 7:253–266.
- 491 Dorgelo, J. 1974. Comparative ecophysiology of gammarids (Crustacea: Amphipoda) from  
492 marine, brackish and fresh-water habitats, exposed to the influence of salinity-  
493 temperature combinations - I. Effect on survival. *Hydrobiological Bulletin* 8:90–108.
- 494 Felten, V., G. Tixier, F. Guéroid, V. De Crespín De Billy, O. Dangles, F. Guerold, De Crespín  
495 V. De Billy, O. Dangles, F. Guéroid, V. De Crespín De Billy, and O. Dangles. 2008.  
496 Quantification of diet variability in a stream amphipod: Implications for ecosystem  
497 functioning. *Fundamental and Applied Limnology / Archiv für Hydrobiologie* 170:303–  
498 313.
- 499 Folmer, O., M. Black, W. Hoeh, R. Lutz, and R. Vrijenhoek. 1994. DNA primers for  
500 amplification of mitochondrial cytochrome c oxidase subunit I from diverse metazoan  
501 invertebrates. *Molecular marine biology and biotechnology* 3:294–299.
- 502 Fox, J., and S. Weisberg. 2019. *An {R} Companion to Applied Regression*. Third. Sage,  
503 Thousand Oaks {CA}.

- 504 Gärdenfors, U. 2010. 2010 Rödlstade arten I Sverige (The 2010 Red List of Swedish  
505 Species). ArtDatabanken. Uppsala.
- 506 Gessner, F. 1957. Meer und Strand. Page (F. Gessner, Ed.). Second edition. VEB Deutscher  
507 Verlag der Wissenschaften, Berlin.
- 508 Grabner, D. S., A. M. Weigand, F. Leese, C. Winking, D. Hering, R. Tollrian, and B. Sures.  
509 2015. Invaders, natives and their enemies: distribution patterns of amphipods and their  
510 microsporidian parasites in the Ruhr Metropolis, Germany. *Parasites and Vectors* 8:1–  
511 15.
- 512 Hasslow, O. J. 1931. Sveriges characéer. *Botaniska Notiser*:63–136.
- 513 HELCOM. 2010. Ecosystem Health of the Baltic sea 2003-2007: HELCOM Initial Holistic  
514 Assessment. *Baltic Sea Environment Proceedings* 122:68.
- 515 HELCOM. 2018. Sources and pathways of nutrients to the Baltic Sea. *Baltic Sea*  
516 *Environmental Proceedings* 153:48.
- 517 Herkül, K., V. Lauringson, and J. Kotta. 2016. Specialization among amphipods: The invasive  
518 *Gammarus tigrinus* has narrower niche space compared to native gammarids. *Ecosphere*  
519 7:1–16.
- 520 Janssen, F., T. Neumann, and M. Schmidt. 2004. Inter-annual variability in cyanobacteria  
521 blooms in the Baltic Sea controlled by wintertime hydrographic conditions. *Marine*  
522 *Ecology Progress Series* 275:59–68.
- 523 Karstens, S., U. Buczko, and S. Glatzel. 2015. Phosphorus storage and mobilization in coastal  
524 *Phragmites* wetlands: Influence of local-scale hydrodynamics. *Estuarine, Coastal and*  
525 *Shelf Science* 164:124–133.
- 526 Karstens, S., U. Buczko, G. Jurasinski, R. Peticzka, and S. Glatzel. 2016. Impact of adjacent

- 527 land use on coastal wetland sediments. *Science of the Total Environment* 550:337–348.
- 528 Kelley, A. L. 2014. The role thermal physiology plays in species invasion. *Conservation*  
529 *Physiology* 2:1–14.
- 530 Kelly, D. W., J. T. A. Dick, and W. I. Montgomery. 2002. The functional role of *Gammarus*  
531 (Crustacea, Amphipoda): Shredders, predators, or both? *Hydrobiologia* 485:199–203.
- 532 Kelly, D. W., J. R. Muirhead, D. D. Heath, and H. J. Macisaac. 2006. Contrasting patterns in  
533 genetic diversity following multiple invasions of fresh and brackish waters. *Molecular*  
534 *Ecology* 15:3641–3653.
- 535 Koop, J. H. E., and M. K. Grieshaber. 2000. The role of ion regulation in the control of the  
536 distribution of *Gammarus tigrinus* (Sexton) in salt-polluted rivers. *Journal of*  
537 *Comparative Physiology - B Biochemical, Systemic, and Environmental Physiology*  
538 170:75–83.
- 539 Körner, S., and T. Dugdale. 2003. Is roach herbivory preventing re-colonization of submerged  
540 macrophytes in a shallow lake? *Hydrobiologia* 506–509:497–501.
- 541 Korpinen, S., and M. Westerbom. 2009. Microhabitat segregation of the amphipod genus  
542 *Gammarus* (Crustacea: Amphipoda) in the Northern Baltic Sea. *Marine Biology*  
543 157:361–370.
- 544 Kotta, J., H. Orav-Kotta, K. Herkül, and I. Kotta. 2011. Habitat choice of the invasive  
545 *Gammarus tigrinus* and the native *Gammarus salinus* indicates weak interspecific  
546 competition. *Boreal Environment Research* 16:64–72.
- 547 Kraufvelin, P., S. Salovius, H. Christie, F. E. Moy, R. Karez, and M. F. Pedersen. 2006.  
548 Eutrophication-induced changes in benthic algae affect the behaviour and fitness of the  
549 marine amphipod *Gammarus locusta*. *Aquatic Botany* 84:199–209.

- 550 Kufel, L., and I. Kufel. 2002. Chara beds acting as nutrient sinks in shallow lakes—a review.  
551 *Aquatic Botany* 72:249–260.
- 552 Kumar, S., G. Stecher, M. Li, C. Knyaz, and K. Tamura. 2018. MEGA X: Molecular  
553 evolutionary genetics analysis across computing platforms. *Molecular Biology and*  
554 *Evolution* 35:1547–1549.
- 555 Kuprijanov, I., J. Kotta, V. Lauringson, and K. Herkül. 2015. Trophic interactions between  
556 native and alien palaemonid prawns and an alien gammarid in a brackish water  
557 ecosystem. *Proceedings of the Estonian Academy of Sciences* 64:518–524.
- 558 Leigh, J. W., and D. Bryant. 2015. POPART: Full-feature software for haplotype network  
559 construction. *Methods in Ecology and Evolution* 6:1110–1116.
- 560 Lenz, M., B. A. P. P. da Gama, N. V. Gerner, J. Gobin, F. Gröner, A. Harry, S. R. Jenkins, P.  
561 Kraufvelin, C. Mummelthei, J. Sareyka, E. A. Xavier, and M. Wahl. 2011. Non-native  
562 marine invertebrates are more tolerant towards environmental stress than taxonomically  
563 related native species: results from a globally replicated study. *Environmental Research*  
564 111:943–52.
- 565 van der Linden, P., and J. F. B. Mitchell. (n.d.). ENSEMBLES: Climate Change and its  
566 Impacts: Summary of research and results from the ENSEMBLES project. FitzRoy  
567 Road, Exeter EX1 3PB, UK.
- 568 Lindner, A. 1972. Soziologisch-ökologische Untersuchungen an der submersen Vegetation in  
569 der Boddenkette südlich des Darß und Zingst. University of Rostock.
- 570 Melzer, A. 1999. Aquatic macrophytes as tools for lake management. *Hydrobiologia*  
571 395/396:181–190.
- 572 Neumann, T., and R. Friedland. 2011. Climate Change Impacts on the Baltic Sea. Pages 23–



- 573 32 in G. Schernewski, J. Hofstede, and T. Neumann, editors. Global Change and Baltic  
574 Coastal Zones. Springer.
- 575 Normant, M., M. Feike, A. Szaniawska, and G. Graf. 2007. Adaptation of *Gammarus tigrinus*  
576 Sexton, 1939 to new environments-Some metabolic investigations. *Thermochimica Acta*  
577 458:107–111.
- 578 Orav-Kotta, H., J. Kotta, K. Herkül, I. Kotta, and T. Paalme. 2009. Seasonal variability in the  
579 grazing potential of the invasive amphipod *Gammarus tigrinus* and the native amphipod  
580 *Gammarus salinus* (Amphipoda: Crustacea) in the northern Baltic Sea. *Biological*  
581 *Invasions* 11:597–608.
- 582 Östman, Ö., J. Eklöf, B. K. Eriksson, J. Olsson, P. O. Moksnes, and U. Bergström. 2016. Top-  
583 down control as important as nutrient enrichment for eutrophication effects in North  
584 Atlantic coastal ecosystems. *Journal of Applied Ecology* 53:1138–1147.
- 585 Paar, M., M. Berthold, R. Schumann, S. Dahlke, and I. Blindow. 2021. Seasonal Variation in  
586 Biomass and Production of the Macrophytobenthos in two Lagoons in the Southern  
587 Baltic Sea. *Frontiers in Earth Science* 8:1–16.
- 588 Paiva, F., A. Barco, Y. Chen, A. Mirzajani, F. T. Chan, V. Lauringson, M. Baltazar-Soares,  
589 A. Zhan, S. A. Bailey, J. Javidpour, and E. Briski. 2018. Is salinity an obstacle for  
590 biological invasions? *Global Change Biology* 24:2708–2720.
- 591 Pellan, L., V. Médoc, D. Renault, T. Spataro, and C. Piscart. 2016. Feeding choice and  
592 predation pressure of two invasive gammarids, *Gammarus tigrinus* and *Dikerogammarus*  
593 *villosus*, under increasing temperature. *Hydrobiologia* 781:43–54.
- 594 Piepho, M. 2017. Assessing maximum depth distribution, vegetated area, and production of  
595 submerged macrophytes in shallow, turbid coastal lagoons of the southern Baltic Sea.

- 596           Hydrobiologia 794:303–316.
- 597   Pitkänen, H., M. Peuraniemi, M. Westerbom, M. Kilpi, and M. Von Numers. 2013. Long-  
598           term changes in distribution and frequency of aquatic vascular plants and charophytes in  
599           an estuary in the Baltic Sea. *Annales Botanici Fennici* 50:1–54.
- 600   Pohl, P., M. K. Ohlhasse, S. K. Rautwurst, and K. Laus-Kinnerk Baasch. 1987. An inexpensive  
601           inorganic medium for the mass cultivation of freshwater microalgae. *Phytochemistry*  
602           26:1657–1659.
- 603   Puche, E., S. Sánchez-Carrillo, M. Álvarez-Cobelas, A. Pukacz, M. A. Rodrigo, and C. Rojo.  
604           2018. Effects of overabundant nitrate and warmer temperatures on charophytes: The  
605           roles of plasticity and local adaptation. *Aquatic Botany* 146:15–22.
- 606   Puntila, R. 2016. *Trophic Interactions and Impacts of Non-indigenous Species in Baltic Sea*  
607           Coastal Ecosystems. University of Helsinki.
- 608   R Core Team. 2019. *R: A Language and Environment for Statistical Computing*. Vienna,  
609           Austria.
- 610   Radulovici, A. E., B. Sainte-Marie, and F. Dufresne. 2009. DNA barcoding of marine  
611           crustaceans from the Estuary and Gulf of St Lawrence: A regional-scale approach.  
612           *Molecular Ecology Resources* 9:181–187.
- 613   Reusch, T. B. H., J. Dierking, H. C. Andersson, E. Bonsdorff, J. Carstensen, M. Casini, M.  
614           Czajkowski, B. Hasler, K. Hinsby, K. Hyytiäinen, K. Johannesson, S. Jomaa, V.  
615           Jormalainen, H. Kuosa, S. Kurland, L. Laikre, B. R. MacKenzie, P. Margonski, F.  
616           Melzner, D. Oesterwind, H. Ojaveer, J. C. Refsgaard, A. Sandström, G. Schwarz, K.  
617           Tonderski, M. Winder, and M. Zandersen. 2018. The Baltic Sea as a time machine for  
618           the future coastal ocean. *Science Advances* 4:eaar8195.

- 619 Rojo, C., M. Carramiñana, D. Cócera, G. P. Roberts, E. Puche, S. Calero, and M. A. Rodrigo.  
620 2017. Different responses of coexisting Chara species to foreseeable Mediterranean  
621 temperature and salinity increases. *Aquatic Botany* in press.
- 622 Sanudo-Wilhelmy, S. A., A. Tovar-Sanchez, F. Fu, D. G. Capone, E. J. Carpenter, and D. A.  
623 Hutchins. 2004. The impact of surface-adsorbed phosphorus on phytoplankton Redfield  
624 stoichiometry. *Nature* 432:897–901.
- 625 Schiewer, U. 2007. Darß-Zingst Boddens, Northern Rügener Boddens and Schlei. Pages 35–  
626 86 in U. Schiewer, M. M. Caldwell, G. Heldmaier, R. B. Jackson, O. L. Lange, H. A.  
627 Mooney, E.-D. Schulze, and U. Sommer, editors. *Ecology of Baltic coastal waters*. First  
628 edition. Springer, Berlin, Heidelberg.
- 629 Schubert, H., and I. Blindow, editors. 2003. *Charophytes of the Baltic Sea*. Gantner, Ruggel,  
630 Königstein and Germany.
- 631 Schubert, H., I. Blindow, N. C. Bueno, M. T. Casanova, M. Pełechaty, and A. Pukacz. 2018.  
632 Ecology of charophytes – permanent pioneers and ecosystem engineers. *Perspectives in*  
633 *Phycology* 5:61–74.
- 634 Schumann, R., H. Baudler, Ä. Glass, K. Dümcke, and U. Karsten. 2006. Long-term  
635 observation on salinity dynamics in a tideless shallow coastal lagoon of the Southern  
636 Baltic Sea coast and their biological relevance. *Journal of Marine Systems* 60:330–344.
- 637 Stewart, N. F., and J. M. Church. 1992. *Red data books of Britain and Ireland-- Stoneworts*.  
638 {Joint Nature Conservation Committee} and {Office of Public Works} and *Plantlife*,  
639 Peterborough.
- 640 Torn, K., G. Martin, and R. Munsterhjelm. 2003. *Chara tomentosa* L. 1753. Pages 131–141 in  
641 H. Schubert and I. Blindow, editors. *Charophytes of the Baltic Sea*. Gantner, Ruggel,

- 642 Königstein, Germany.
- 643 Torn, K., G. Martin, and T. Paalme. 2006. Seasonal changes in biomass, elongation growth  
644 and primary production rate of *Chara tomentosa* in the NE Baltic Sea. *Annales Botanici*  
645 *Fennici* 43:276–283.
- 646 Volkmann, C. 2016. The impact of organic material for macrophytes in coastal waters of the  
647 Baltic Sea. University of Rostock.
- 648 Wickham, H. 2016. *ggplot2: Elegant Graphics for Data Analysis*. Springer-Verlag New York.
- 649 Wood, S. N. 2011. Fast stable restricted maximum likelihood and marginal likelihood  
650 estimation of semiparametric generalized linear models. *Journal of the Royal Statistical*  
651 *Society (B)* 73:3–36.
- 652 Wüstenberg, A., Y. Pörs, and R. Ehwald. 2011. Culturing of stoneworts and submersed  
653 angiosperms with phosphate uptake exclusively from an artificial sediment. *Freshwater*  
654 *Biology* 56:1531–1539.
- 655 Zettler, M. L. 1995. Erstnachweis von *Gammarus tigrinus* Sexton, 1939 (Crustacea:  
656 Amphipoda) in der Darss-Zingster-Boddenkette und seine derzeitige Verbreitung an der  
657 deutschen Ostseeküste. *Arch. Freunde Naturg. Mecklb.* XXXIV:137–141.
- 658 Zettler, M. L. 2001. Some malacostracan crustacean assemblages in the southern and western  
659 Baltic Sea. Rostock. *Meeresebiolog. Beitr.* 9:127–143.
- 660 Zettler, M. L., and A. Zettler. 2017. *Marine and freshwater Amphipoda from the Baltic Sea*  
661 *and adjacent territories*. 2. Auflage. Conchbooks, Hackenheim.
- 662

663 **Figures**

664

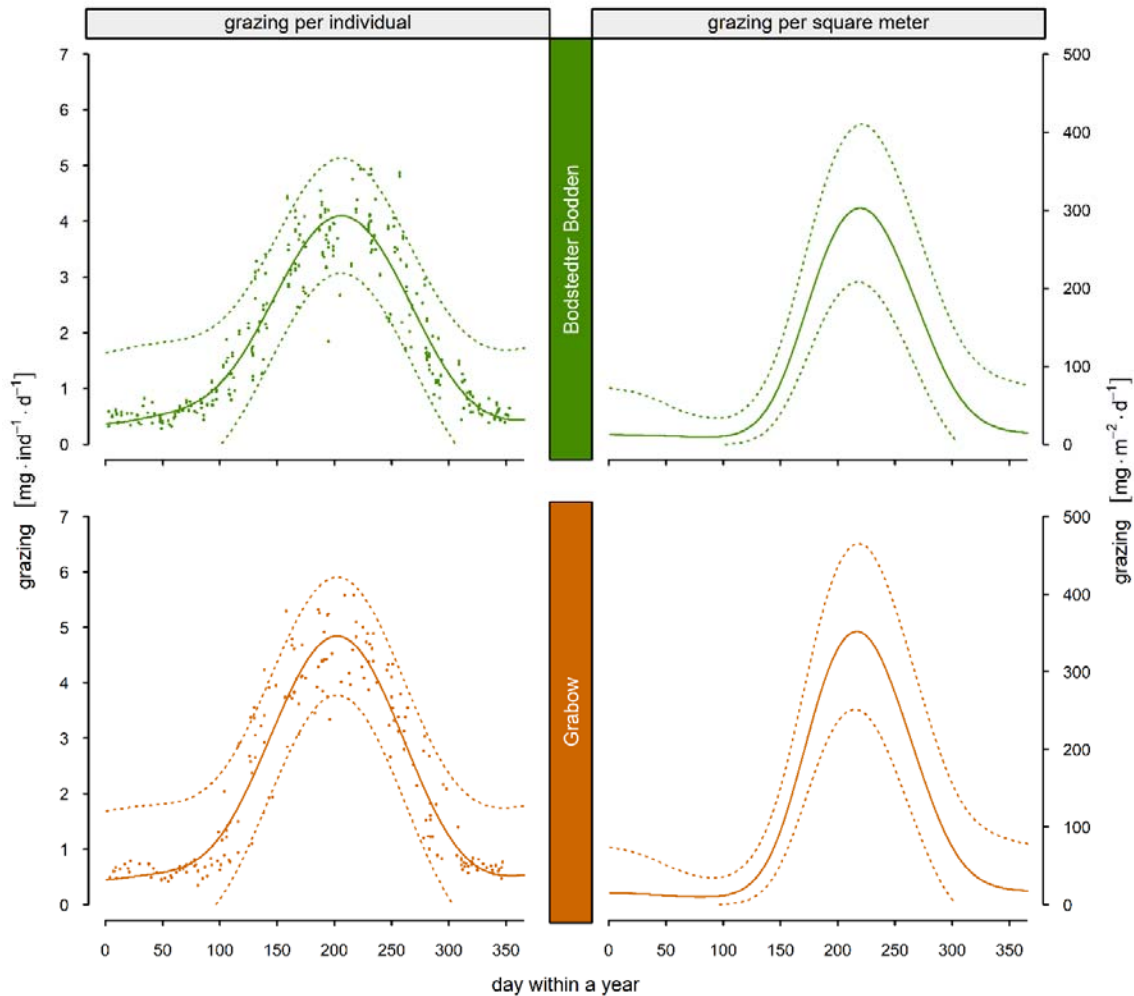

665 Figure 1: Seasonal losses of *Chara* sp. biomass by grazing of *Gammarus tigrinus* in the  
666 Bodstedter Bodden (upper panel) and Grabow (lower panel) over the years of 2000 to 2018.  
667 The losses of *Chara* sp. biomass by individual grazing (points) were modelled (generalized  
668 additive model) depending on temperature and salinity conditions at the respective time point  
669 in the water body (left). Grazing per square meter (right) was calculated as the product of the  
670 individual grazing model (left) and the seasonal population development of *Gammarus*

671 *tigrinus* (Supplement Figure S5) with a maximum abundance of 400 individuals per square  
672 meter. The solid line represents the mean and the dotted line the 95 % confidence interval.

673

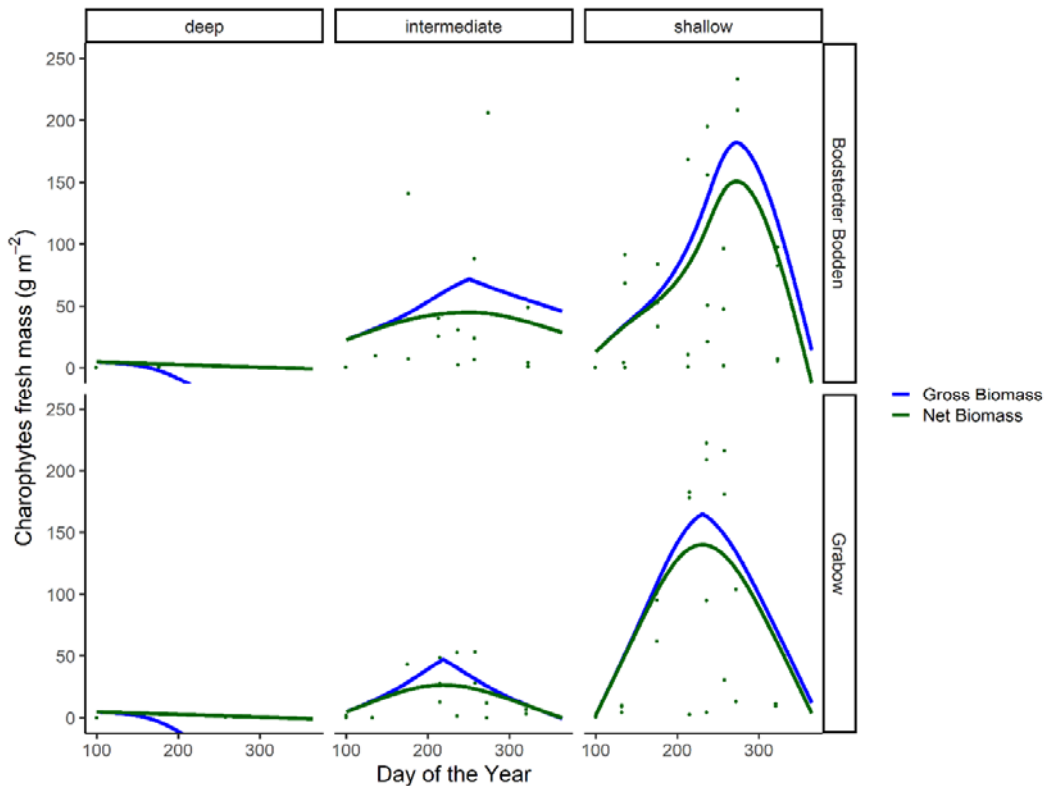

674 Figure 2 Charophyte fresh mass in gram per square meter at two sampling locations of the  
675 Darss-Zingst lagoon system along a water depth/distance to reed belt transect. Shallow depth  
676 (30 – 60 cm) and close to reed belt, intermediate depth (60 – 90 cm) and distance to reed belt,  
677 deep depth (90 – 120 cm) and farthest distance to reed belt. Net biomass represents model-  
678 fitted values (generalized additive model) of observed charophyte biomass. Green points  
679 represent observed charophyte biomass at the respective day. Gross biomass represents the  
680 sum of net biomass plus biomass possibly lost by abiotic influenced seasonally resolved  
681 *Gammarus tigrinus* grazing.

682

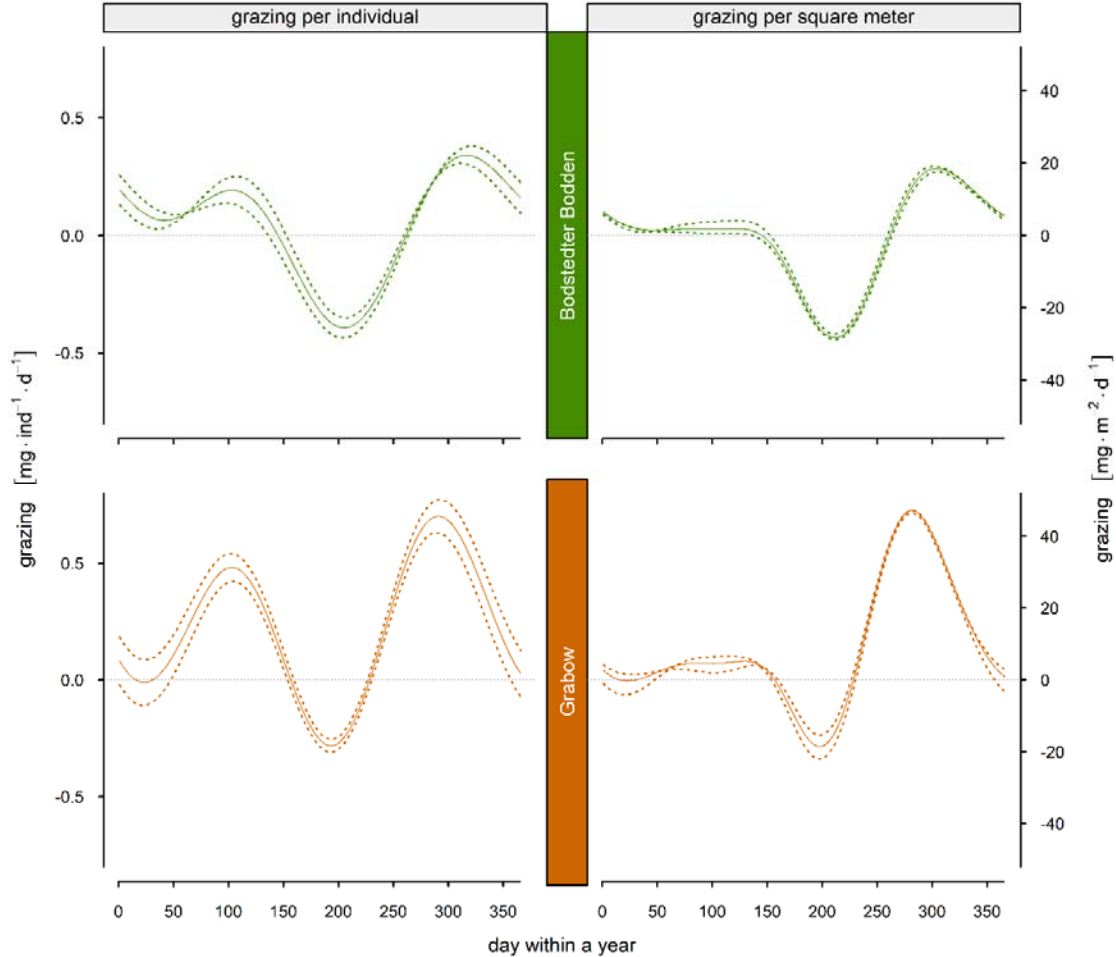

683 Figure 3: Future projection of seasonal losses of *Chara* sp. biomass by grazing of *Gammarus*  
684 *tigrinus* in the Bodstedter Bodden (upper panel) and Grabow (lower panel) as difference to  
685 present day grazing. Projections were calculated with a delta change approach of recent data  
686 with projected changes. Data from 2000 to 2018 was modified in temperature (+2.75 K) and  
687 salinity ( $-1.75 \text{ g kg}^{-1}$ ) as described in Neumann and Freidland (2011) and van der Linden, P.  
688 and Mitchell, J. F. B. (2009). Losses of *Chara* sp. biomass by individual grazing were  
689 modelled depending on the modified temperature and salinity conditions at the respective  
690 time point in the water body (left). Grazing per square meter (right) was calculated as the

691 product of the individual grazing model (left) and the seasonal population development of  
692 *Gammarus tigrinus* (Supplement Figure S5) with a maximum abundance of 400 individuals  
693 per square meter. The solid line represents the mean and the dotted line the 95 % confidence  
694 interval.

## 695 **Tables**

696 Table 1: Sum of losses of *Chara* sp. biomass by individual grazing or by grazing at one  
697 square meter with respect to the seasonal population pattern of *Gammarus tigrinus*  
698 (Supplement Figure S5) with a maximum abundance of 400 individuals per square meter.  
699 These were calculated for the Bodstedter Bodden and the Grabow as well as for the recent  
700 data and the future projection.

| <b>CWB</b>        | <b>base</b>    | <b>recent<br/>[mg a<sup>-1</sup>]</b> | <b>projected<br/>[mg a<sup>-1</sup>]</b> | <b><math>\Delta_{(\text{proj.}-\text{rec.})}</math><br/>[mg a<sup>-1</sup>]</b> | <b><math>\Delta / \text{rec.}</math><br/>[%]</b> |
|-------------------|----------------|---------------------------------------|------------------------------------------|---------------------------------------------------------------------------------|--------------------------------------------------|
| Bodstedter Bodden | ind.           | 672,6                                 | 687,3                                    | 14,7                                                                            | 2,2                                              |
| Grabow            | ind.           | 768,3                                 | 847,9                                    | 79,6                                                                            | 10,4                                             |
| Bodstedter Bodden | m <sup>2</sup> | 36132,5                               | 35860,5                                  | -272                                                                            | -0,8                                             |
| Grabow            | m <sup>2</sup> | 41014,9                               | 44230,3                                  | 3215,5                                                                          | 7,8                                              |

701

702

703



704 **Supplement**

705 Genetic analyses

706 At the end of the grazing experiment, 69 gammarids were determined as *Gammarus tigrinus*  
707 following Zettler and Zettler (2017) and preserved in 80 % ethanol. To verify the  
708 morphological analyses, a genetic approach was conducted on 15 individuals. Total genomic  
709 DNA was extracted using a silica spin column procedure with the DNeasy Blood and Tissue  
710 Kit (Qiagen, Hilden, Germany) following the protocol provided by the manufacturer. Partial  
711 sequences of the COI gene were amplified with the universal primers LCO 1490 and HCO  
712 2198 (Folmer et al. 1994).  
713 PCR amplifications were performed with a denaturation step for 60 s at 94°C, followed by 5  
714 cycles of: 60 s at 94°C, 90 s at 45°C and 60 s at 72°C, 35 cycles of: 60 s at 94°C, 90 s at 51°C  
715 and 60 s at 72°C, and completed with 5 min at 72°C as a final extension step. PCR was  
716 performed in a 30 µl reaction volume with a Taq PCR Master Mix (Qiagen, Hilden,  
717 Germany) consisting 2.5 mM MgCl<sub>2</sub>, and 0.5 pmol of each primer (final concentration). The  
718 PCR products were extracted from agarose gels according to the protocol of the Biometra-  
719 innuPrep Gel Extraction Kit (Analytik Jena, Jena, Germany), and were sequenced directly  
720 using a 3130×L Genetic Analyzer (Applied Biosystems, NY, USA) with sequencing primers  
721 identical to the primers that were used for the PCR reaction. Obtained sequences were quality  
722 controlled and aligned via the BIOEDIT software (Hall 1999). The COI gene is widely used  
723 for inter- and intraspecific diversification questions concerning amphipod taxa. For the  
724 taxonomic determination addition GenBank sequences of *Gammarus tigrinus* (see  
725 Supplement Table S1), *G. duebeni* Liljeborg, 1852 (EU421779), *G. locusta* Linnaeus, 1758  
726 (KT209211), *G. oceanicus* Segerstråle, 1947 (GQ341809), *G. pulex* Linnaeus, 1758  
727 (MN400977), *G. roeseli* Gervais, 1835 (EF570337) *G. salinus* Spooner, 1947 (KT208533),

728 and *G. zaddachi* Sexton, 1912 (KU845083) were used for the phylogenetic analyses.  
 729 In order to estimate the evolutionary divergence between haplotypes, pair-wise uncorrected p-  
 730 distances and the number of substitutions were conducted using MEGA version X (Kumar et  
 731 al. 2018). To uncover phylogenetic relationships, a Maximum likelihood tree was constructed  
 732 using MEGA version X (Kumar et al. 2018) on the basis of the Kimura 2-parameter model.  
 733 Branch support for the nodes was calculated from 1000 bootstrap replicates.  
 734 To study the distribution of mtDNA sequence diversity, a haplotype network was constructed  
 735 using the Median-joining algorithm (Bandelt et al. 1999) implemented in PopART (Leigh and  
 736 Bryant 2015). The distribution basemap was created with QGIS.org software  
 737 (<http://www.qgis.org>) and modified in CorelDRAW (Corel Corporation, Ottawa, Ontario,  
 738 Canada).

739

740 Supplement Table 1: Sample list of specimens used for the phylogenetic tree and the  
 741 determination of haplotypes. Indicated are the localities, if available the salinity of the  
 742 sampling site, the identified haplotypes and the accession numbers (F=freshwater sites).

| Country | Site                                                   | Lat., Lon.          | Sal. | haplotype            | AccessionNo                                                                                                    | Ref.                             |
|---------|--------------------------------------------------------|---------------------|------|----------------------|----------------------------------------------------------------------------------------------------------------|----------------------------------|
| Denmark | Bornholm,<br>Hovedstaden, Baltic<br>Sea, Svaneke       | 55.1329,<br>15.152  |      | N1                   | MK403734                                                                                                       | Baltazar-Soares<br>et al. (2017) |
|         | Bornholm,<br>Hovedstaden,<br>Ostersoen stream,<br>Nexo | 55.0569,<br>15.127  |      | N1, N4a              | MK403733, MK403736                                                                                             | Baltazar-Soares<br>et al. (2017) |
| Estonia | Liu                                                    | 58.2744,<br>24.2528 | 4.7  | N1, N4a,<br>N4e      | KU845009-KU845015,<br>KU845017-KU845021,<br>KU845023-KU845027                                                  | Paiva et al. 2018                |
|         | Pärnu                                                  | 58.3748,<br>24.4734 | 4.28 | N1, N4a,<br>N4d, N4e | KU845029, KU845030,<br>KU845033, KU845035-<br>KU845038, KU845040-<br>KU845043, KU845046,<br>KU845049, KU845050 | (Paiva et al.<br>2018)           |
| Finland | Turku                                                  | 60.4,               | 4.4  | N4a, N4d,            | DQ523177, DQ523178,                                                                                            | Kelly et al. 2006                |

|               |                       |                                 |            |                  |                                          |                          |
|---------------|-----------------------|---------------------------------|------------|------------------|------------------------------------------|--------------------------|
|               |                       | 22.2                            |            | N4e              | DQ523183                                 |                          |
| Germany       | <b>Born, DZLS</b>     | <b>54.379434,<br/>12.524819</b> | <b>5.5</b> | <b>N4a, N4e</b>  | <b>MW509071-MW509085</b>                 | <b>this study</b>        |
|               | Dierhagen lagoon      | 54.2,<br>12.3                   | 1.5        | N4a, N4e         | DQ523178, DQ523183                       | Kelly et al. 2006        |
|               | Travemünde            | 53.9655,<br>10.8851             | 10         | N1               | KU844994-KU845006                        | Paiva et al. 2018        |
|               | North Rhine           | 51.7328950,<br>7.1774890        | F          | N1, N4a,<br>N4c  | KT075215, KT075216,<br>KT075218-KT075220 | (Grabner et al. 2015)    |
| Netherlands   | Buiten-IJ, Amsterdamm | 52.369028,<br>4.990722          | F          | N4d              | EF570348                                 | Hou et al. 2007          |
|               | Lake Gouwee,          | 52.4,<br>5.0                    | F          | N4a, N4c         | DQ300227, DQ523183                       | Kelly et al. 2006        |
| North Ireland | Bann river            | 54.8,<br>-6.4                   | F          | N4a, N4b,<br>N4e | DQ523178, DQ523181,<br>DQ523183          | Kelly et al. 2006        |
|               | Lough Neagh,          | 54.7,<br>-6.5                   | F          | N4a, N4d,<br>N4e | DQ523177, DQ523178,<br>DQ523183          | Kelly et al. 2006        |
| Poland        | Brody, Oder river     | 52.0,<br>15.4                   | F          | N4a, N4d,<br>N4e | DQ523177, DQ523178,<br>DQ523183          | Kelly et al. 2006        |
|               | Bytom, Oder river     | 51.7,<br>15.8                   | F          | N4a, N4d,<br>N4e | DQ523177, DQ523178,<br>DQ523183          | Kelly et al. 2006        |
|               | Gdansk Bay, Puck      | 54.723394,<br>18.416633         |            | N4a, N4e         | GQ341858-GQ341861                        | Costa et al. 2009        |
|               | Vistula lagoon        | 54.3,<br>19.7                   | 4.5        | N1, N4a          | DQ300212, DQ523183                       | Kelly et al. 2006        |
| Canada        | New Brunswick         | 47.037389,<br>-65.163250        |            | N1, N2           | FJ581678, FJ581679                       | (Radulovici et al. 2009) |
|               | Nova Scotia           | 45.631983,<br>-61.958414        |            | N2               | FJ581680-FJ581683                        | Radulovici et al. 2009   |
|               | Quebec                | 47.149100,<br>-70.521900        |            | N1, N3           | FJ581684-FJ581690                        | Radulovici et al. 2009   |

|                                 |                                                              |                     |      |                   |                                                                                       |                                |
|---------------------------------|--------------------------------------------------------------|---------------------|------|-------------------|---------------------------------------------------------------------------------------|--------------------------------|
|                                 | St. John estuary                                             | 45.3,<br>-66.2      | 4.1  | N1                | DQ300250, DQ300251                                                                    | (Kelly et al. 2006)            |
|                                 | St. Lawrence, d/s Quebec, Cap Brule                          | 46.9,<br>-70.5      | 6.5  | N3                | DQ300211                                                                              | Kelly et al. 2006              |
| USA                             | Berrys creek, New Hampshire                                  | 43.0,<br>-70.7      | 16   | N1                | DQ300208-DQ300210                                                                     | Kelly et al. 2006              |
|                                 | Chesapeake Bay, Virginia                                     | 37.45,<br>-76.67    |      | N4b               | DQ300219, DQ300220, DQ523180, DQ523181                                                | Kelly et al. 2006              |
|                                 | Delaware estuary, Deemers Beach, Delaware                    | 39.6,<br>-75.5      | 5    | N3,N4a, N4b       | DQ523181-DQ523184, DQ523189                                                           | Kelly et al. 2006              |
|                                 | Delaware estuary, Delaware                                   | 39.57,<br>-75.58    |      | N3, N4a           | DQ300221, DQ300222, DQ300225                                                          | Kelly et al. 2006              |
|                                 | Elizabeth estuary, Virginia                                  | 36.7,<br>-76.2      | 10.2 | N3, N4a, N4c      | DQ300224, DQ300226, DQ300227-DQ300231, DQ523183, DQ523186-DQ523188, DQ523190-DQ523195 | Kelly et al. 2006              |
|                                 | Hudson estuary, New York                                     | 40.9,<br>-73.8      | 7.8  | N3                | DQ523179                                                                              | Kelly et al. 2006              |
|                                 | Maryland, Rhode River, SERC Education Dock                   | 38.885,<br>-76.542  |      | N4a, N4b          | KU905729, KU905737, KU905742, KU905952                                                | unpublished, direct submission |
|                                 | Maryland, Thoroughfare Island, Potomac River, Chesapeake Bay | 38.5731,<br>-77.175 |      | N4b               | MH235818                                                                              | (Baltazar-Soares et al. 2017)  |
|                                 | Neuse River: d/s New Bern, N. Carolina                       | 35.1,<br>-77.0      | 14.2 | Southern Species  | DQ300240-DQ300244                                                                     | Kelly et al. 2006              |
| Pawcatuck estuary, Rhode Island | 41.3,<br>-71.8                                               | 11.2                | N2   | DQ300245-DQ300249 | Kelly et al. 2006                                                                     |                                |

743

744

745

746 Supplement Table 2: Differences of biomass change between control group (without  
 747 *G. tigrinus*) and treatment group (with *G. tigrinus*) with respect to species, Salinity (S) and  
 748 temperature (T). Furthermore the differences between the groups were statistical analyzed and  
 749 the p-value calculated with the non-parametrical Mann-Whitney U-Test.

| Species                | S<br>[g·kg <sup>-1</sup> ] | T<br>[°C] | N  | Median<br>Control | Median<br>Treatment | Δ Median<br>(T-C) | p-value<br>(U-Test) |
|------------------------|----------------------------|-----------|----|-------------------|---------------------|-------------------|---------------------|
| <i>Chara aspera</i>    | 3                          | 9         | 8  | -0,7              | -11,0               | -10,3             | 0,01*               |
| <i>Chara aspera</i>    | 3                          | 15        | 8  | -0,7              | -13,7               | -13,0             | 0,01*               |
| <i>Chara aspera</i>    | 3                          | 24        | 8  | -7,3              | -26,0               | -18,7             | 0,03*               |
| <i>Chara aspera</i>    | 3                          | 30        | 8  | -15,3             | -11,8               | 3,5               | 0,60                |
| <i>Chara aspera</i>    | 5                          | 9         | 8  | -0,5              | -9,0                | -8,5              | 0,01*               |
| <i>Chara aspera</i>    | 5                          | 15        | 8  | -2,9              | -15,2               | -12,2             | 0,01*               |
| <i>Chara aspera</i>    | 5                          | 24        | 8  | -2,3              | -20,1               | -17,8             | 0,01*               |
| <i>Chara aspera</i>    | 5                          | 30        | 8  | -3,3              | -28,5               | -25,2             | 0,00*               |
| <i>Chara aspera</i>    | 7                          | 9         | 8  | 0,2               | -7,6                | -7,8              | 0,12                |
| <i>Chara aspera</i>    | 7                          | 15        | 8  | 0,4               | -18,5               | -18,8             | 0,01*               |
| <i>Chara aspera</i>    | 7                          | 24        | 8  | -2,2              | -33,6               | -31,3             | 0,00*               |
| <i>Chara aspera</i>    | 7                          | 30        | 8  | -12,9             | -34,9               | -22,0             | 0,03*               |
| <i>Chara aspera</i>    | 13                         | 9         | 8  | 0,9               | -5,9                | -6,8              | 0,02*               |
| <i>Chara aspera</i>    | 13                         | 15        | 8  | 0,2               | -13,5               | -13,7             | 0,02*               |
| <i>Chara aspera</i>    | 13                         | 24        | 8  | -4,2              | -35,3               | -31,1             | 0,01*               |
| <i>Chara aspera</i>    | 13                         | 30        | 8  | -14,3             | -34,0               | -19,8             | 0,02*               |
| <i>Chara tomentosa</i> | 3                          | 9         | 8  | -0,7              | -2,6                | -1,9              | 0,17                |
| <i>Chara tomentosa</i> | 3                          | 15        | 8  | -2,8              | -7,3                | -4,5              | 0,12                |
| <i>Chara tomentosa</i> | 3                          | 24        | 8  | -2,0              | -17,3               | -15,4             | 0,01*               |
| <i>Chara tomentosa</i> | 3                          | 30        | 8  | -4,7              | -14,5               | -9,7              | 0,04*               |
| <i>Chara tomentosa</i> | 5                          | 9         | 8  | 0,9               | -5,5                | -6,4              | 0,04*               |
| <i>Chara tomentosa</i> | 5                          | 15        | 8  | -0,3              | -9,0                | -8,7              | 0,14                |
| <i>Chara tomentosa</i> | 5                          | 24        | 8  | -3,6              | -8,2                | -4,6              | 0,03*               |
| <i>Chara tomentosa</i> | 5                          | 30        | 8  | -3,3              | -11,1               | -7,9              | 0,03*               |
| <i>Chara tomentosa</i> | 7                          | 9         | 8  | -1,7              | -6,0                | -4,3              | 0,12                |
| <i>Chara tomentosa</i> | 7                          | 15        | 8  | 3,2               | -6,5                | -9,7              | 0,01*               |
| <i>Chara tomentosa</i> | 7                          | 24        | 8  | 2,0               | -17,0               | -19,0             | 0,04*               |
| <i>Chara tomentosa</i> | 7                          | 30        | 8  | -7,0              | -9,6                | -2,6              | 0,35                |
| <i>Chara tomentosa</i> | 13                         | 9         | 8  | -0,9              | -5,7                | -4,8              | 0,00*               |
| <i>Chara tomentosa</i> | 13                         | 15        | 8  | -0,1              | -7,5                | -7,4              | 0,25                |
| <i>Chara tomentosa</i> | 13                         | 24        | 8  | -1,5              | -6,7                | -5,2              | 0,02*               |
| <i>Chara tomentosa</i> | 13                         | 30        | 8  | -4,0              | -13,7               | -9,7              | 0,02*               |
| <i>Chara sp.</i>       | 3                          | 9         | 16 | -0,7              | -7,5                | -6,8              | 0,01*               |
| <i>Chara sp.</i>       | 3                          | 15        | 16 | -1,7              | -8,6                | -6,9              | 0,00*               |
| <i>Chara sp.</i>       | 3                          | 24        | 16 | -3,1              | -17,7               | -14,6             | 0,00*               |
| <i>Chara sp.</i>       | 3                          | 30        | 16 | -6,1              | -14,0               | -7,8              | 0,03*               |
| <i>Chara sp.</i>       | 5                          | 9         | 16 | 0,2               | -8,3                | -8,4              | 0,00*               |
| <i>Chara sp.</i>       | 5                          | 15        | 16 | -1,7              | -10,4               | -8,7              | 0,00*               |
| <i>Chara sp.</i>       | 5                          | 24        | 16 | -2,6              | -14,9               | -12,4             | 0,00*               |
| <i>Chara sp.</i>       | 5                          | 30        | 16 | -3,3              | -15,5               | -12,2             | 0,00*               |
| <i>Chara sp.</i>       | 7                          | 9         | 16 | -1,1              | -6,2                | -5,1              | 0,03*               |
| <i>Chara sp.</i>       | 7                          | 15        | 16 | 1,8               | -8,3                | -10,0             | 0,00*               |
| <i>Chara sp.</i>       | 7                          | 24        | 16 | 1,2               | -22,9               | -24,2             | 0,00*               |

|                  |    |    |    |       |       |       |       |
|------------------|----|----|----|-------|-------|-------|-------|
| <i>Chara sp.</i> | 7  | 30 | 16 | -10,7 | -20,4 | -9,6  | 0,04* |
| <i>Chara sp.</i> | 13 | 9  | 16 | 0,6   | -5,9  | -6,6  | 0,00* |
| <i>Chara sp.</i> | 13 | 15 | 16 | 0,0   | -9,9  | -9,9  | 0,01* |
| <i>Chara sp.</i> | 13 | 24 | 16 | -2,3  | -29,1 | -26,9 | 0,00* |
| <i>Chara sp.</i> | 13 | 30 | 16 | -8,1  | -20,0 | -11,8 | 0,01* |

750

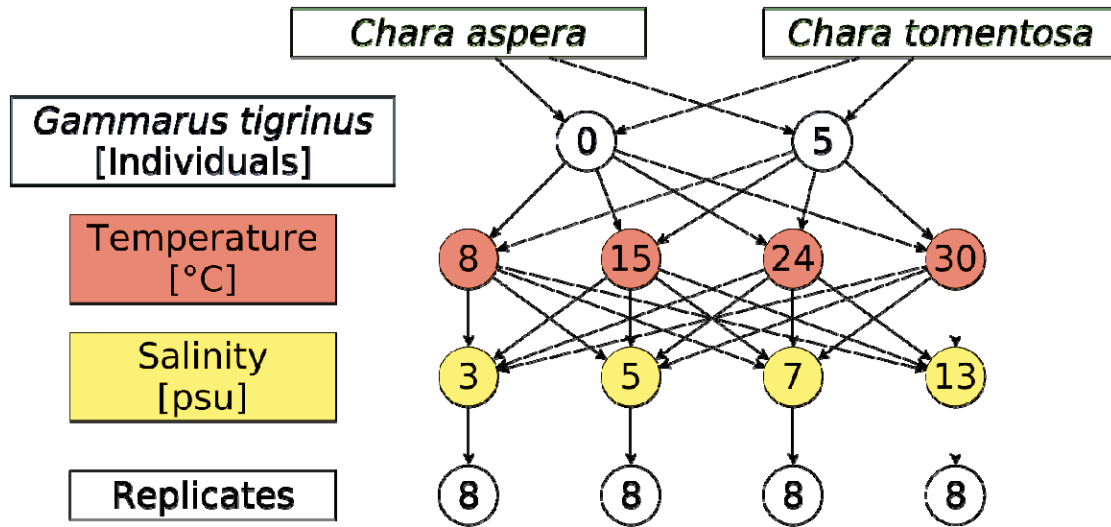

751 Figure S1 Flow scheme of the full factorial experimental design for temperature, and salinity

752 with *Chara aspera* and *C. tomentosa*, with and without *Gammarus tigrinus*.

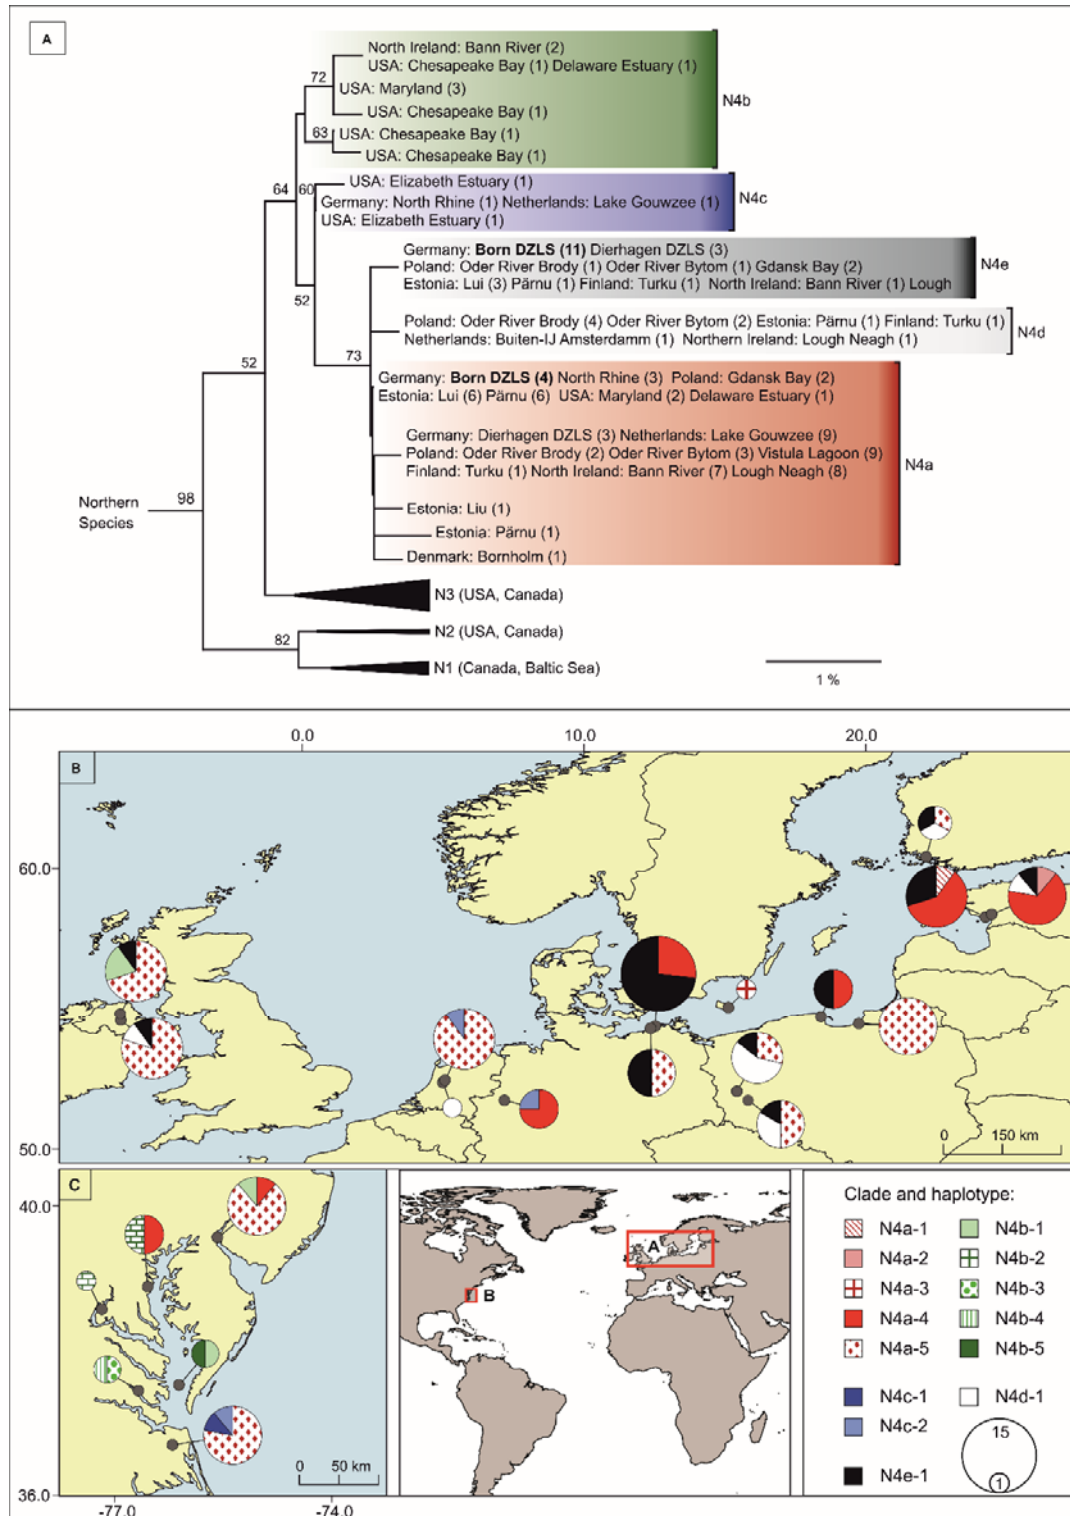

753

754 Figure S2 (A) Phylogeny of *Gammarus tigrinus* COI haplotypes inferred by using the  
 755 Maximum Likelihood method (Tamura-Nei model +I+ $\Gamma$ ) with bootstrap values above the  
 756 branches (1000 replicates). The clade numbers are identical to Kelly et al. (2006) and the

757 coloured boxes indicate haplotypes of clade N4. Haplotypes N4a and N4e comprised the  
758 individuals from the DZLS. (B & C) Distribution of *Gammarus tigrinus* haplotypes of clade  
759 N4 identified by COI network analysis. Pie charts indicated haplotype frequencies in  
760 European (B) and North American (C) populations. More information on haplotypes can be  
761 found in Supplement Table S1.

762

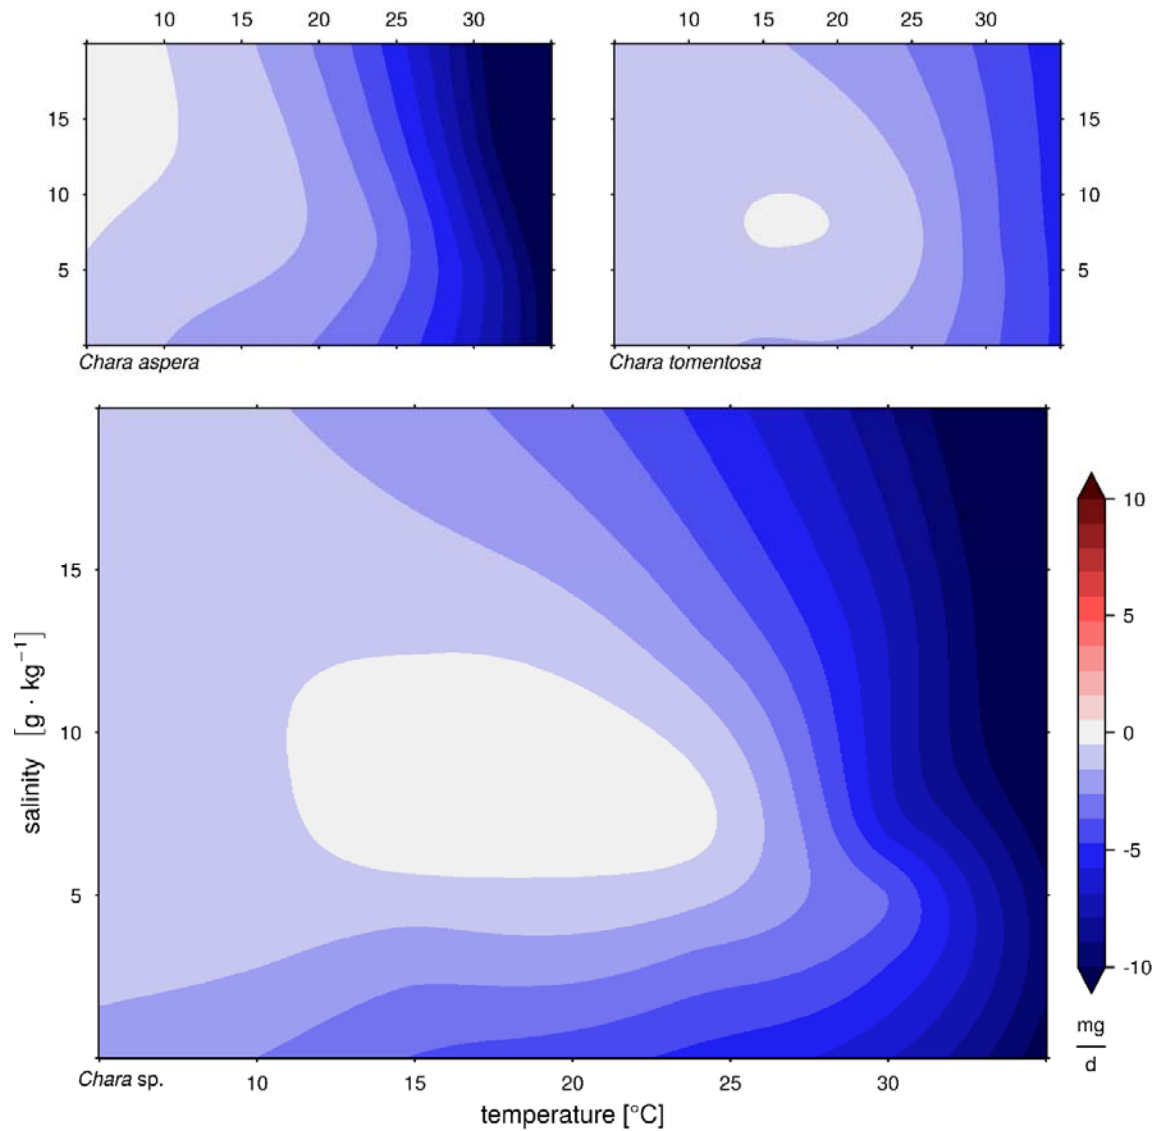

763



764 Figure S3 Generalized additive model for change in biomass of *Chara aspera* (top left),  
765 *Chara tomentosa* (top right) and for both Chara species (bottom) in respect to different  
766 salinity and temperature levels.

767

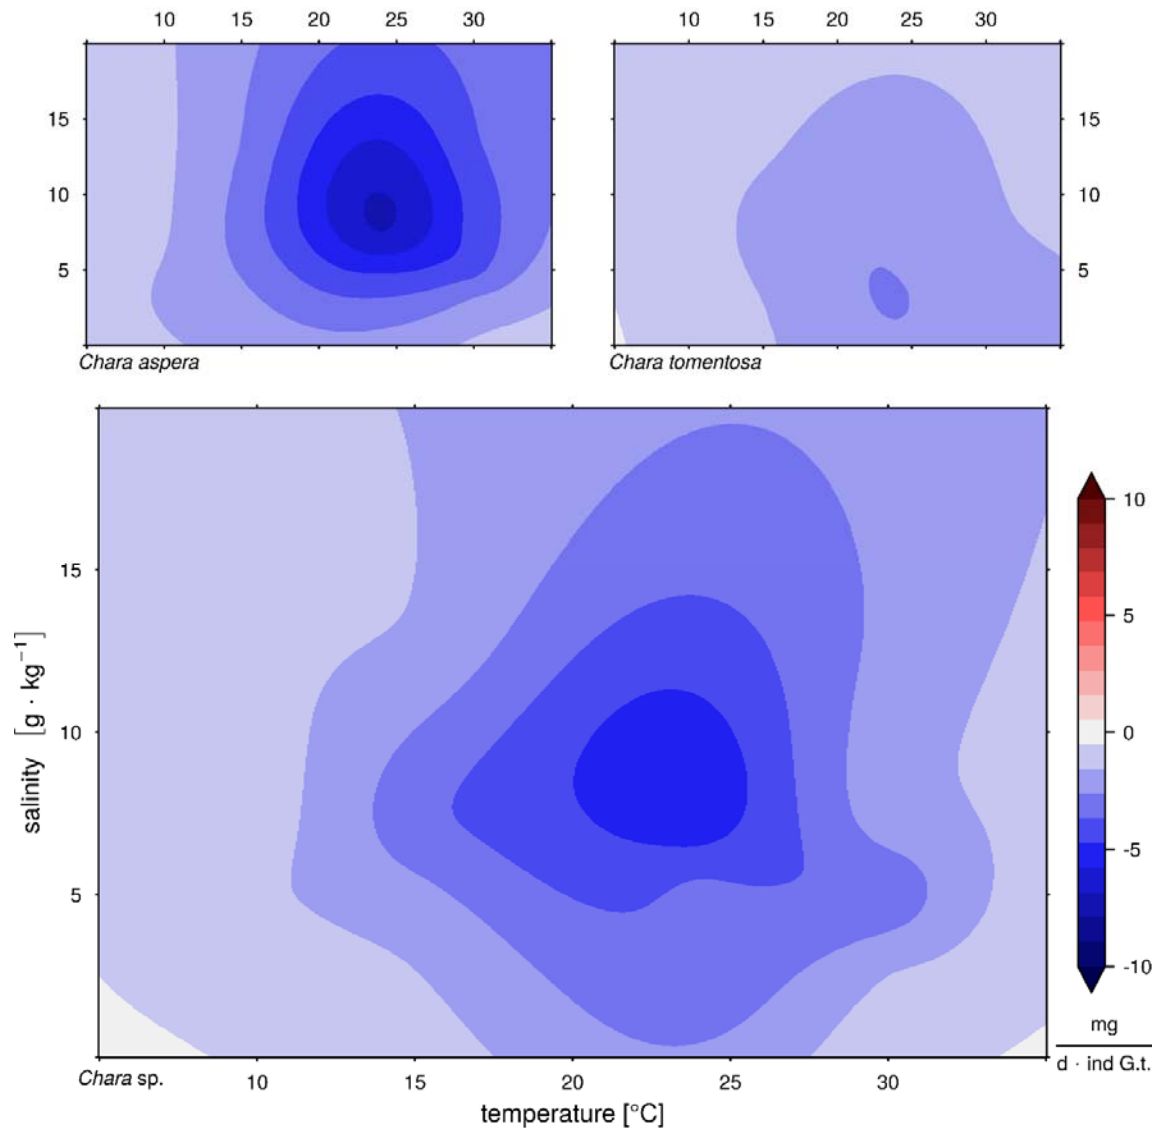

769 Figure S4 Generalized additive model for loss of biomass caused by growth corrected grazing  
770 of an individual of *Gammarus tigrinus* (G.t.) on *Chara aspera* (top left), *Chara tomentosa*  
771 (top right) and on both Chara species (bottom) in respect to different salinity and temperature  
772 levels.

773

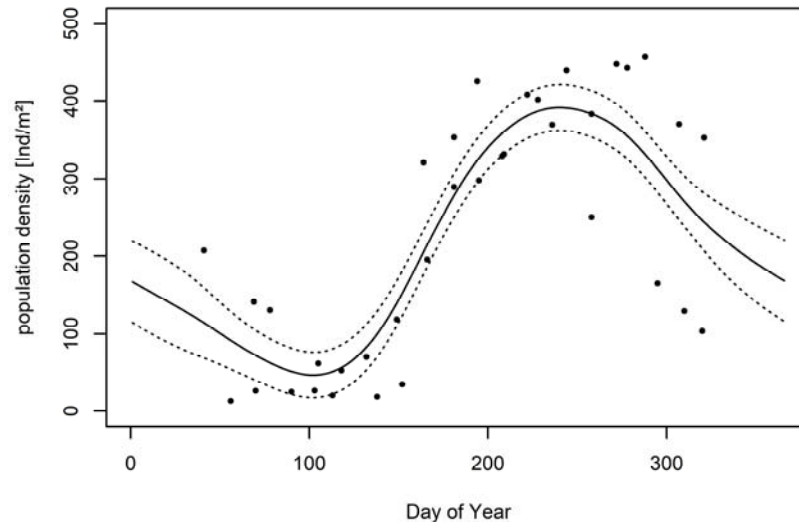

774

775 Figure S5 Model of seasonal pattern of *Gammarus tigrinus* calculated with population  
776 densities from Chambers (1977) and modified to have a maximum of 400 individuals per  
777 square meter based on values of Zettler (1995) and of M. Paar (personal communication).

778

#### 779 Elemental composition

780 There were no significant differences for the C:N and C:P ratios along the depth distribution,  
781 or between stations (see pooled values Figure S6). Charophytes showed either a weak  
782 seasonal trend in elemental composition (C:N), or the ratio decreased (C:P). Lowest C:P  
783 ratios were found from July to October. Contrary, co-occurring tracheophytes increased their  
784 C:N ratio during summer, as well as their C:P ratios. These findings indicate that charophytes  
785 had probably a higher protein content per biomass compared to tracheophytes.

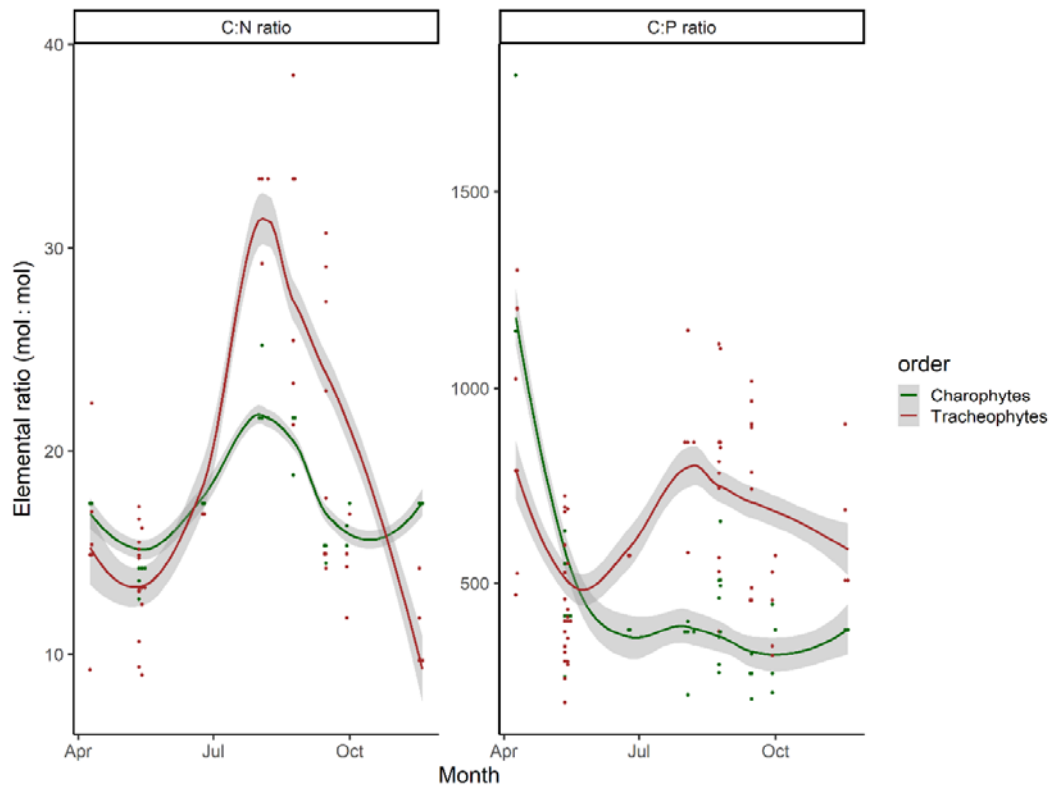

786 Figure S6 Elemental ratio of Carbon to Nitrogen (C:N) and Carbon to Phosphorus (C:P) of  
787 macrophyte biomass (separated by order) at two stations of the Darss-Zingst lagoon system  
788 across all sampling stations (Bodstedter Bodden and Grabow) and sampling depths in 2014.  
789 Please note the different scaling. Points represent measured elemental ratios, lines a local  
790 regression (LOESS – locally estimated scatter smoothing), and the ribbons the 95%  
791 confidence intervals (Wickham 2016).

792

793
